# Supplementary material for: The Influence of Clinically Diagnosed Neuropathy on Respiratory Muscle Strength in Type 2 Diabetes Mellitus
Source: PubMed Central journal article supplement (PMC6304822; doi:10.1155/2018/8065938), 2018-11-29
Supplement: 8065938.f1.pdf [file 8065938.f1.pdf]

| CODE   | groep | NP95rec3 | leeftijd | vetperc | BMI  | HbA1c_per | HbA1ccat | HbA1c_mrr |
|--------|-------|----------|----------|---------|------|-----------|----------|-----------|
| CTR001 | 2,00  | 3        | 73       | 49,20   | 31,2 | 6,1       | #LEEG!   | 43        |
| CTR002 | 2,00  | 3        | 81       | 48,80   | 27,3 | 6,3       | #LEEG!   | 46        |
| CTR005 | 2,00  | 3        | 78       | 49,90   | 31,4 | 5,7       | #LEEG!   | 39        |
| CTR006 | 2,00  | 3        | 92       | 49,20   | 29,6 | 5,7       | #LEEG!   | 39        |
| CTR023 | 2,00  | 3        | 69       | 44,80   | 41,7 | 6,0       | #LEEG!   | 42        |
| CTR024 | 2,00  | 3        | 76       | 42,40   | 29,8 | 5,2       | #LEEG!   | 33        |
| CTR029 | 2,00  | 3        | 80       | 22,10   | 22,4 | 6,2       | #LEEG!   | 44        |
| CTR036 | 2,00  | 3        | 86       | 50,70   | 33,7 | 5,7       | #LEEG!   | 39        |
| CTR043 | 2,00  | 3        | 84       | 53,90   | 28,3 | 5,0       | #LEEG!   | 31        |
| CTR047 | 2,00  | 3        | 72       | 26,60   | 25,6 | 4,8       | #LEEG!   | 29        |
| CTR049 | 2,00  | 3        | 73       | 31,90   | 25,0 | 5,5       | #LEEG!   | 37        |
| CTR051 | 2,00  | 3        | 70       | 28,90   | 25,3 | 5,1       | #LEEG!   | 32        |
| CTR052 | 2,00  | 3        | 72       | 33,50   | 25,0 | 5,4       | #LEEG!   | 36        |
| CTR054 | 2,00  | 3        | 67       | 26,70   | 23,6 | 5,3       | #LEEG!   | 34        |
| CTR055 | 2,00  | 3        | 75       | 43,40   | 29,0 | 5,6       | #LEEG!   | 38        |
| CTR057 | 2,00  | 3        | 71       | 30,30   | 25,7 | 5,4       | #LEEG!   | 36        |
| CTR058 | 2,00  | 3        | 67       | 32,70   | 30,3 | 5,8       | #LEEG!   | 40        |
| CTR059 | 2,00  | 3        | 71       | 26,50   | 24,2 | 5,2       | #LEEG!   | 33        |
| CTR060 | 2,00  | 3        | 69       | 39,60   | 27,1 | 5,4       | #LEEG!   | 36        |
| CTR061 | 2,00  | 3        | 68       | 20,70   | 23,7 | 5,0       | #LEEG!   | 31        |
| CTR062 | 2,00  | 3        | 72       | 29,50   | 26,5 | 5,2       | #LEEG!   | 33        |
| CTR063 | 2,00  | 3        | 73       | 30,00   | 23,5 | 5,4       | #LEEG!   | 36        |
| CTR064 | 2,00  | 3        | 61       | 20,90   | 26,3 | 5,1       | #LEEG!   | 32        |
| CTR066 | 2,00  | 3        | 66       | 25,10   | 32,9 | 5,7       | #LEEG!   | 39        |
| CTR068 | 2,00  | 3        | 69       | 41,50   | 27,5 | 6,5       | #LEEG!   | 48        |
| CTR070 | 2,00  | 3        | 71       | 40,70   | 23,4 | 5,4       | #LEEG!   | 36        |
| CTR072 | 2,00  | 3        | 79       | 32,80   | 32,1 | 5,8       | #LEEG!   | 40        |
| CTR073 | 2,00  | 3        | 78       | 33,10   | 26,8 | 5,3       | #LEEG!   | 34        |
| CTR074 | 2,00  | 3        | 83       | 50,20   | 30,7 | 5,2       | #LEEG!   | 33        |
| CTR078 | 2,00  | 3        | 67       | 31,80   | 30,7 | 6,0       | #LEEG!   | 42        |
| CTR085 | 2,00  | 3        | 66       | 45,20   | 26,8 | 5,4       | #LEEG!   | 36        |
| CTR089 | 2,00  | 3        | 63       | 38,60   | 22,1 | 5,0       | #LEEG!   | 31        |
| CTR094 | 2,00  | 3        | 67       | 32,80   | 23,9 | 4,9       | #LEEG!   | 30        |
| CTR095 | 2,00  | 3        | 73       | 36,70   | 27,1 | 6,2       | #LEEG!   | 44        |
| CTR097 | 2,00  | 3        | 75       | 41,90   | 27,2 | 5,5       | #LEEG!   | 37        |
| DIA001 | 1,00  | 1        | 76       | 43,90   | 40,8 | 8,3       | 1        | 68        |
| DIA002 | 1,00  | 1        | 70       | 41,80   | 26,0 | 6,1       | 0        | 43        |
| DIA003 | 1,00  | 1        | 75       | 32,70   | 25,5 | 6,4       | 0        | 47        |
| DIA005 | 1,00  | 1        | 91       | 54,10   | 28,5 | 6,8       | 1        | 51        |
| DIA006 | 1,00  | 1        | 93       | 58,00   | 29,8 | 5,6       | 0        | 38        |
| DIA007 | 1,00  | 1        | 91       | 9999,00 | 20,4 | 5,7       | 0        | 39        |
| DIA008 | 1,00  | 1        | 76       | 32,10   | 26,9 | 5,5       | 0        | 37        |
| DIA009 | 1,00  | 1        | 66       | 40,30   | 28,9 | 7,9       | 1        | 63        |
| DIA011 | 1,00  | 1        | 84       | 34,70   | 24,7 | 6,3       | 0        | 45        |
| DIA012 | 1,00  | 1        | 85       | 56,10   | 28,9 | 5,4       | 0        | 36        |
| DIA013 | 1,00  | 1        | 81       | 58,10   | 51,0 | 5,8       | 0        | 40        |
| DIA014 | 1,00  | 1        | 82       | 51,10   | 29,6 | 5,8       | 0        | 40        |
| DIA015 | 1,00  | 1        | 80       | 54,50   | 32,9 | 5,8       | 0        | 40        |
| DIA016 | 1,00  | 1        | 83       | 47,30   | 29,1 | 5,3       | 0        | 34        |

|        |      |   |    |         |      |        |      |      |
|--------|------|---|----|---------|------|--------|------|------|
| DIA017 | 1,00 | 0 | 88 | 51,30   | 28,6 | 6,7    | 1    | 50   |
| DIA018 | 1,00 | 1 | 79 | 33,10   | 31,9 | 6,5    | 1    | 48   |
| DIA019 | 1,00 | 1 | 68 | 50,00   | 33,1 | 7,5    | 1    | 58   |
| DIA021 | 1,00 | 0 | 74 | 56,10   | 41,9 | 6,5    | 1    | 48   |
| DIA022 | 1,00 | 1 | 80 | 49,30   | 24,7 | 9999,0 | 9999 | 9999 |
| DIA023 | 1,00 | 1 | 76 | 31,10   | 23,2 | 6,4    | 0    | 46   |
| DIA024 | 1,00 | 1 | 61 | 47,20   | 32,6 | 5,6    | 0    | 38   |
| DIA025 | 1,00 | 1 | 85 | 9999,00 | 26,7 | 7,0    | 1    | 53   |
| DIA027 | 1,00 | 1 | 85 | 42,40   | 27,9 | 9999,0 | 9999 | 9999 |
| DIA028 | 1,00 | 1 | 86 | 39,70   | 23,8 | 9999,0 | 9999 | 9999 |
| DIA029 | 1,00 | 0 | 72 | 30,50   | 31,3 | 8,3    | 1    | 67   |
| DIA030 | 1,00 | 1 | 79 | 43,90   | 26,8 | 6,6    | 1    | 49   |
| DIA031 | 1,00 | 1 | 87 | 47,50   | 26,2 | 6,4    | 0    | 46   |
| DIA032 | 1,00 | 1 | 86 | 48,40   | 31,0 | 5,9    | 0    | 41   |
| DIA033 | 1,00 | 1 | 90 | 43,10   | 36,3 | 7,5    | 1    | 58   |
| DIA034 | 1,00 | 1 | 93 | 54,70   | 19,8 | 6,4    | 0    | 46   |
| DIA035 | 1,00 | 1 | 73 | 42,10   | 34,0 | 6,4    | 0    | 46   |
| DIA036 | 1,00 | 0 | 79 | 32,00   | 31,1 | 6,5    | 1    | 48   |
| DIA038 | 1,00 | 1 | 77 | 47,50   | 28,2 | 6,8    | 1    | 51   |
| DIA039 | 1,00 | 1 | 89 | 49,50   | 33,7 | 6,1    | 0    | 43   |
| DIA041 | 1,00 | 1 | 91 | 46,30   | 24,7 | 6,5    | 1    | 48   |
| DIA042 | 1,00 | 1 | 87 | 47,60   | 31,6 | 8,2    | 1    | 66   |
| DIA043 | 1,00 | 0 | 94 | 46,00   | 22,1 | 6,1    | 0    | 43   |
| DIA044 | 1,00 | 1 | 87 | 44,70   | 26,3 | 8,6    | 1    | 70   |
| DIA045 | 1,00 | 1 | 81 | 51,00   | 36,4 | 7,4    | 1    | 56   |
| DIA047 | 1,00 | 1 | 83 | 45,00   | 25,3 | 9,9    | 1    | 85   |
| DIA048 | 1,00 | 1 | 81 | 49,30   | 31,8 | 6,3    | 0    | 45   |
| DIA049 | 1,00 | 1 | 80 | 57,60   | 37,7 | 8,5    | 1    | 69   |
| DIA050 | 1,00 | 1 | 75 | 53,20   | 36,4 | 6,0    | 0    | 42   |
| DIA051 | 1,00 | 0 | 93 | 56,40   | 29,0 | 5,8    | 0    | 40   |
| DIA052 | 1,00 | 1 | 68 | 34,10   | 28,8 | 5,1    | 0    | 32   |
| DIA053 | 1,00 | 1 | 71 | 33,90   | 35,9 | 9,4    | 1    | 79   |
| DIA054 | 1,00 | 1 | 84 | 41,30   | 31,0 | 5,9    | 0    | 41   |
| DIA055 | 1,00 | 0 | 74 | 56,00   | 40,5 | 5,9    | 0    | 41   |
| DIA056 | 1,00 | 1 | 76 | 36,00   | 27,1 | 6,0    | 0    | 42   |
| DIA057 | 1,00 | 1 | 80 | 35,90   | 22,6 | 6,2    | 0    | 44   |
| DIA058 | 1,00 | 1 | 91 | 45,00   | 27,3 | 6,2    | 0    | 44   |
| DIA059 | 1,00 | 1 | 87 | 31,90   | 28,3 | 9,1    | 1    | 76   |
| DIA060 | 1,00 | 1 | 92 | 38,80   | 24,8 | 6,3    | 0    | 45   |
| DIA061 | 1,00 | 1 | 83 | 42,20   | 31,4 | 6,8    | 1    | 51   |
| DIA062 | 1,00 | 0 | 89 | 33,00   | 25,2 | 6,8    | 1    | 51   |
| DIA063 | 1,00 | 1 | 78 | 24,90   | 26,0 | 6,7    | 1    | 50   |
| DIA064 | 1,00 | 1 | 71 | 29,40   | 20,4 | 7,1    | 1    | 54   |
| DIA065 | 1,00 | 1 | 75 | 35,30   | 28,0 | 8,6    | 1    | 70   |
| DIA066 | 1,00 | 1 | 63 | 29,30   | 24,8 | 5,3    | 0    | 34   |
| DIA067 | 1,00 | 1 | 86 | 48,70   | 38,4 | 12,3   | 1    | 111  |
| DIA069 | 1,00 | 1 | 76 | 53,90   | 37,9 | 8,5    | 1    | 69   |
| DIA071 | 1,00 | 1 | 85 | 45,70   | 27,8 | 5,7    | 0    | 39   |
| DIA072 | 1,00 | 0 | 83 | 29,40   | 24,3 | 5,4    | 0    | 36   |
| DIA074 | 1,00 | 0 | 86 | 55,90   | 38,2 | 6,6    | 1    | 49   |

|        |      |   |    |         |      |        |      |      |
|--------|------|---|----|---------|------|--------|------|------|
| DIA075 | 1,00 | 0 | 64 | 24,80   | 28,2 | 7,0    | 1    | 53   |
| DIA076 | 1,00 | 1 | 68 | 27,20   | 24,5 | 7,1    | 1    | 54   |
| DIA077 | 1,00 | 1 | 92 | 51,80   | 26,9 | 6,2    | 0    | 44   |
| DIA078 | 1,00 | 1 | 81 | 41,10   | 31,0 | 7,7    | 1    | 61   |
| DIA081 | 1,00 | 1 | 90 | 32,00   | 24,2 | 6,8    | 1    | 51   |
| DIA082 | 1,00 | 1 | 89 | 9999,00 | 29,3 | 6,9    | 1    | 52   |
| DIA084 | 1,00 | 0 | 88 | 33,70   | 25,4 | 6,5    | 1    | 48   |
| DIA086 | 1,00 | 0 | 89 | 52,60   | 28,9 | 6,9    | 1    | 52   |
| DIA087 | 1,00 | 0 | 93 | 41,60   | 30,2 | 6,7    | 1    | 50   |
| DIA088 | 1,00 | 1 | 70 | 53,80   | 40,0 | 6,3    | 0    | 45   |
| DIA089 | 1,00 | 1 | 71 | 46,20   | 31,7 | 5,3    | 0    | 34   |
| DIA090 | 1,00 | 1 | 65 | 46,10   | 29,9 | 8,2    | 1    | 66   |
| DIA092 | 1,00 | 0 | 69 | 27,00   | 26,8 | 8,1    | 1    | 65   |
| DIA093 | 1,00 | 1 | 82 | 31,50   | 27,7 | 7,5    | 1    | 58   |
| DIA094 | 1,00 | 1 | 67 | 45,50   | 32,8 | 5,6    | 0    | 38   |
| DIA095 | 1,00 | 0 | 62 | 56,50   | 45,7 | 6,2    | 0    | 44   |
| DIA096 | 1,00 | 1 | 79 | 27,20   | 23,3 | 6,1    | 0    | 43   |
| DIA097 | 1,00 | 1 | 74 | 49,90   | 35,5 | 7,2    | 1    | 55   |
| DIA099 | 1,00 | 1 | 69 | 36,70   | 33,8 | 6,8    | 1    | 51   |
| DIA100 | 1,00 | 0 | 62 | 54,00   | 41,1 | 7,5    | 1    | 58   |
| DIA101 | 1,00 | 1 | 73 | 43,20   | 31,1 | 7,0    | 1    | 53   |
| DIA103 | 1,00 | 0 | 77 | 15,90   | 26,8 | 8,5    | 1    | 69   |
| DIA104 | 1,00 | 1 | 92 | 38,50   | 26,3 | 6,7    | 1    | 50   |
| DIA105 | 1,00 | 0 | 83 | 50,80   | 28,2 | 7,4    | 1    | 57   |
| DIA106 | 1,00 | 1 | 69 | 30,00   | 23,2 | 5,8    | 0    | 40   |
| DIA107 | 1,00 | 0 | 78 | 44,50   | 26,0 | 6,4    | 0    | 46   |
| DIA108 | 1,00 | 0 | 73 | 28,90   | 30,3 | 6,1    | 0    | 43   |
| DIA109 | 1,00 | 1 | 68 | 41,00   | 26,3 | 5,9    | 0    | 41   |
| DIA110 | 1,00 | 1 | 63 | 52,80   | 32,8 | 6,1    | 0    | 43   |
| DIA111 | 1,00 | 0 | 94 | 47,50   | 33,9 | 5,6    | 0    | 38   |
| DIA112 | 1,00 | 1 | 77 | 33,80   | 26,8 | 5,6    | 0    | 38   |
| DIA113 | 1,00 | 1 | 74 | 33,10   | 25,7 | 6,6    | 1    | 49   |
| DIA114 | 1,00 | 1 | 63 | 48,40   | 34,1 | 9,3    | 1    | 78   |
| DIA115 | 1,00 | 0 | 79 | 46,20   | 33,5 | 9999,0 | 9999 | 9999 |
| DIA116 | 1,00 | 1 | 96 | 41,90   | 22,9 | 6,1    | 0    | 43   |
| DIA117 | 1,00 | 1 | 77 | 46,00   | 28,6 | 5,3    | 0    | 34   |
| DIA118 | 1,00 | 1 | 74 | 49,70   | 33,1 | 7,2    | 1    | 55   |
| DIA119 | 1,00 | 0 | 69 | 58,20   | 43,0 | 5,6    | 0    | 38   |
| DIA120 | 1,00 | 0 | 80 | 50,00   | 32,5 | 6,1    | 0    | 43   |
| DIA121 | 1,00 | 0 | 75 | 51,80   | 27,8 | 7,4    | 1    | 57   |
| DIA122 | 1,00 | 0 | 64 | 31,00   | 27,9 | 6,1    | 0    | 43   |
| DIA123 | 1,00 | 1 | 64 | 20,00   | 21,8 | 5,6    | 0    | 38   |
| DIA124 | 1,00 | 1 | 60 | 30,20   | 26,0 | 6,3    | 0    | 45   |
| DIA125 | 1,00 | 1 | 75 | 49,90   | 33,9 | 6,4    | 0    | 46   |
| DIA126 | 1,00 | 0 | 79 | 38,70   | 30,3 | 6,9    | 1    | 52   |
| DIA127 | 1,00 | 1 | 61 | 22,10   | 26,5 | 7,1    | 1    | 54   |

| duur    | diabet  | TOTAAL | Bæ | geslacht | m1 | verblijf | 0 | th   | HKK | max    | @2m | 44      | tandem  | smal    | semitander |
|---------|---------|--------|----|----------|----|----------|---|------|-----|--------|-----|---------|---------|---------|------------|
| 9999,00 |         | 11,53  |    | 2        |    | 1        |   | 17   |     | 3,5    |     | 10,00   | 10,00   | 10,00   | 10,00      |
| 9999,00 |         | 7,30   |    | 2        |    | 1        |   | 20   |     | 3,5    |     | 10,00   | 10,00   | 10,00   | 10,00      |
| 9999,00 |         | 3,06   |    | 2        |    | 1        |   | 12   |     | 5,5    |     | 10,00   | 10,00   | 10,00   | 10,00      |
| 9999,00 |         | 3,21   |    | 2        |    | 1        |   | 6    |     | 6,5    |     | 7,10    | 10,00   | 10,00   | 10,00      |
| 9999,00 |         | 2,34   |    | 1        |    | 1        |   | 26   |     | 3,0    |     | 10,00   | 10,00   | 10,00   | 10,00      |
| 9999,00 |         | 7,84   |    | 2        |    | 1        |   | 12   |     | 2,0    |     | 5,00    | 10,00   | 10,00   | 10,00      |
| 9999,00 |         | 1,24   |    | 2        |    | 1        |   | 9999 |     | 4,0    |     | 6,00    | 10,00   | 10,00   | 10,00      |
| 9999,00 |         | 2,66   |    | 2        |    | 1        |   | 10   |     | 9999,0 |     | 9999,00 | 9999,00 | 9999,00 | 9999,00    |
| 9999,00 | 9999,00 |        |    | 2        |    | 1        |   | 9999 |     | 4,4    |     | 10,00   | 10,00   | 10,00   | 10,00      |
| 9999,00 |         | 5,94   |    | 1        |    | 0        |   | 39   |     | 2,1    |     | 10,00   | 10,00   | 10,00   | 10,00      |
| 9999,00 |         | 7,88   |    | 1        |    | 0        |   | 22   |     | 1,8    |     | 10,00   | 10,00   | 10,00   | 10,00      |
| 9999,00 |         | 4,81   |    | 2        |    | 0        |   | 40   |     | 2,6    |     | 10,00   | 10,00   | 10,00   | 10,00      |
| 9999,00 |         | 11,84  |    | 1        |    | 1        |   | 19   |     | 3,0    |     | 10,00   | 10,00   | 10,00   | 10,00      |
| 9999,00 |         | 9,32   |    | 1        |    | 0        |   | 28   |     | 2,7    |     | 10,00   | 10,00   | 10,00   | 10,00      |
| 9999,00 |         | 6,68   |    | 2        |    | 0        |   | 16   |     | 2,1    |     | 10,00   | 10,00   | 10,00   | 10,00      |
| 9999,00 |         | 3,79   |    | 1        |    | 0        |   | 45   |     | 1,9    |     | 10,00   | 10,00   | 10,00   | 10,00      |
| 9999,00 |         | 14,35  |    | 1        |    | 0        |   | 54   |     | 1,8    |     | 10,00   | 10,00   | 10,00   | 10,00      |
| 9999,00 |         | 18,76  |    | 1        |    | 0        |   | 42   |     | 2,2    |     | 10,00   | 10,00   | 10,00   | 10,00      |
| 9999,00 | 9999,00 |        |    | 2        |    | 0        |   | 14   |     | 2,2    |     | 10,00   | 10,00   | 10,00   | 10,00      |
| 9999,00 | 9999,00 |        |    | 1        |    | 0        |   | 40   |     | 1,8    |     | 10,00   | 10,00   | 10,00   | 10,00      |
| 9999,00 |         | 9,47   |    | 1        |    | 0        |   | 42   |     | 1,4    |     | 10,00   | 10,00   | 10,00   | 10,00      |
| 9999,00 |         | 14,14  |    | 1        |    | 0        |   | 30   |     | 2,5    |     | 10,00   | 10,00   | 10,00   | 10,00      |
| 9999,00 | 9999,00 |        |    | 1        |    | 0        |   | 45   |     | 1,8    |     | 10,00   | 10,00   | 10,00   | 10,00      |
| 9999,00 |         | 9,51   |    | 1        |    | 0        |   | 47   |     | 2,0    |     | 10,00   | 10,00   | 10,00   | 10,00      |
| 9999,00 | 9999,00 |        |    | 2        |    | 0        |   | 18   |     | 2,2    |     | 10,00   | 10,00   | 10,00   | 10,00      |
| 9999,00 |         | 9,10   |    | 2        |    | 0        |   | 22   |     | 2,5    |     | 10,00   | 10,00   | 10,00   | 10,00      |
| 9999,00 |         | 15,24  |    | 1        |    | 0        |   | 26   |     | 2,3    |     | 10,00   | 10,00   | 10,00   | 10,00      |
| 9999,00 |         | 11,53  |    | 1        |    | 0        |   | 38   |     | 2,1    |     | 10,00   | 10,00   | 10,00   | 10,00      |
| 9999,00 | 9999,00 |        |    | 2        |    | 0        |   | 20   |     | 2,6    |     | 10,00   | 10,00   | 10,00   | 10,00      |
| 9999,00 |         | 5,84   |    | 2        |    | 0        |   | 20   |     | 1,8    |     | 10,00   | 10,00   | 10,00   | 10,00      |
| 9999,00 | 9999,00 |        |    | 2        |    | 0        |   | 24   |     | 1,8    |     | 10,00   | 10,00   | 10,00   | 10,00      |
| 9999,00 | 9999,00 |        |    | 2        |    | 0        |   | 30   |     | 1,9    |     | 10,00   | 10,00   | 10,00   | 10,00      |
| 9999,00 |         | 32,19  |    | 2        |    | 0        |   | 20   |     | 2,2    |     | 10,00   | 10,00   | 10,00   | 10,00      |
| 9999,00 |         | 8,55   |    | 2        |    | 0        |   | 26   |     | 1,8    |     | 10,00   | 10,00   | 10,00   | 10,00      |
| 9999,00 | 9999,00 |        |    | 2        |    | 0        |   | 19   |     | 2,3    |     | 10,00   | 10,00   | 10,00   | 10,00      |
| 10,00   |         | 1,36   |    | 1        |    | 0        |   | 22   |     | 3,5    |     | 0,00    | 10,00   | 10,00   | 10,00      |
| 16,00   |         | 7,78   |    | 2        |    | 0        |   | 21   |     | 3,0    |     | 10,00   | 10,00   | 10,00   | 10,00      |
| 4,00    | 9999,00 |        |    | 1        |    | 0        |   | 22   |     | 3,7    |     | 0,00    | 10,00   | 10,00   | 10,00      |
| 9999,00 |         | 3,95   |    | 2        |    | 1        |   | 14   |     | 4,1    |     | 10,00   | 10,00   | 10,00   | 10,00      |
| 5,00    |         | 1,14   |    | 2        |    | 1        |   | 11   |     | 10,8   |     | 0,00    | 10,00   | 10,00   | 10,00      |
| 15,00   |         | 5,62   |    | 2        |    | 1        |   | 8    |     | 6,2    |     | 6,84    | 10,00   | 10,00   | 10,00      |
| 35,00   |         | 3,16   |    | 1        |    | 0        |   | 39   |     | 3,8    |     | 0,00    | 1,00    | 0,00    | 0,00       |
| 9999,00 | 9999,00 |        |    | 2        |    | 0        |   | 14   |     | 2,4    |     | 10,00   | 10,00   | 10,00   | 10,00      |
| 0,17    |         | 0,91   |    | 1        |    | 1        |   | 24   |     | 3,3    |     | 10,00   | 10,00   | 10,00   | 10,00      |
| 9999,00 | 9999,00 |        |    | 2        |    | 1        |   | 10   |     | 3,4    |     | 0,00    | 10,00   | 10,00   | 10,00      |
| 20,00   |         | 3,19   |    | 2        |    | 1        |   | 16   |     | 3,7    |     | 9,50    | 10,00   | 10,00   | 10,00      |
| 6,00    |         | 1,84   |    | 2        |    | 1        |   | 5    |     | 5,1    |     | 10,00   | 10,00   | 10,00   | 10,00      |
| 5,00    |         | 4,18   |    | 2        |    | 1        |   | 15   |     | 3,0    |     | 10,00   | 10,00   | 10,00   | 10,00      |
| 9999,00 | 9999,00 |        |    | 2        |    | 1        |   | 7    |     | 5,0    |     | 9999,00 | 10,00   | 9999,00 | 9999,00    |

|         |         |   |   |      |        |         |       |       |
|---------|---------|---|---|------|--------|---------|-------|-------|
| 25,00   | 9999,00 | 2 | 1 | 16   | 4,7    | 0,00    | 3,00  | 0,00  |
| 5,00    | 4,90    | 1 | 0 | 23   | 3,0    | 2,32    | 10,00 | 10,00 |
| 20,00   | 9,84    | 2 | 0 | 22   | 3,1    | 10,00   | 10,00 | 10,00 |
| 9999,00 | 9999,00 | 2 | 1 | 16   | 4,1    | 10,00   | 10,00 | 10,00 |
| 8,00    | 1,14    | 2 | 1 | 12   | 9999,0 | 0,00    | 0,00  | 0,00  |
| 2,00    | 1,14    | 1 | 1 | 30   | 2,2    | 10,00   | 10,00 | 10,00 |
| 7,00    | 6,32    | 2 | 1 | 9999 | 4,8    | 0,00    | 10,00 | 0,00  |
| 3,00    | 3,19    | 2 | 1 | 10   | 9,2    | 0,00    | 0,00  | 0,00  |
| 10,00   | 1,14    | 2 | 1 | 9999 | 8,5    | 6,53    | 10,00 | 10,00 |
| 9999,00 | 9999,00 | 2 | 1 | 8    | 13,3   | 0,00    | 0,00  | 0,00  |
| 4,00    | 6,36    | 1 | 1 | 24   | 4,2    | 10,00   | 10,00 | 10,00 |
| 10,00   | 4,16    | 2 | 1 | 10   | 5,4    | 10,00   | 10,00 | 10,00 |
| 9999,00 | 6,99    | 2 | 1 | 12   | 4,1    | 0,00    | 0,00  | 0,00  |
| 12,00   | 1,65    | 2 | 1 | 8    | 6,3    | 0,00    | 10,00 | 10,00 |
| 8,00    | 0,00    | 2 | 1 | 8    | 8,1    | 0,00    | 10,00 | 10,00 |
| 9999,00 | 1,14    | 2 | 1 | 9999 | 12,1   | 6,06    | 10,00 | 10,00 |
| 6,00    | 1,77    | 1 | 1 | 28   | 3,4    | 9999,00 | 10,00 | 10,00 |
| 35,00   | 9,61    | 1 | 1 | 25   | 3,4    | 0,00    | 10,00 | 10,00 |
| 5,00    | 4,15    | 2 | 1 | 18   | 3,5    | 3,50    | 10,00 | 10,00 |
| 10,00   | 1,61    | 2 | 1 | 16   | 8,5    | 0,00    | 10,00 | 0,00  |
| 5,00    | 0,00    | 2 | 1 | 9999 | 3,6    | 9999,00 | 10,00 | 10,00 |
| 5,00    | 4,45    | 2 | 1 | 15   | 3,7    | 9999,00 | 10,00 | 10,00 |
| 6,00    | 1,89    | 2 | 1 | 5    | 8,4    | 9999,00 | 10,00 | 10,00 |
| 22,00   | 2,00    | 2 | 1 | 11   | 4,6    | 5,00    | 10,00 | 10,00 |
| 20,00   | 1,14    | 2 | 1 | 18   | 8,4    | 0,00    | 10,00 | 10,00 |
| 3,00    | 1,78    | 2 | 1 | 6    | 6,7    | 0,00    | 10,00 | 10,00 |
| 6,00    | 1,77    | 2 | 1 | 10   | 12,2   | 9999,00 | 10,00 | 10,00 |
| 4,00    | 0,00    | 2 | 1 | 9999 | 9,9    | 1,00    | 10,00 | 10,00 |
| 6,00    | 3,72    | 2 | 1 | 18   | 5,1    | 10,00   | 10,00 | 10,00 |
| 9999,00 | 9999,00 | 2 | 1 | 9999 | 6,7    | 0,00    | 10,00 | 10,00 |
| 10,00   | 0,34    | 1 | 1 | 10   | 3,4    | 0,00    | 10,00 | 0,00  |
| 9999,00 | 2,47    | 1 | 1 | 20   | 4,8    | 0,00    | 10,00 | 10,00 |
| 9999,00 | 9999,00 | 1 | 1 | 8    | 6,7    | 1,69    | 10,00 | 10,00 |
| 5,00    | 1,92    | 2 | 1 | 9999 | 6,1    | 0,00    | 0,00  | 0,00  |
| 4,00    | 0,00    | 1 | 1 | 18   | 5,1    | 1,50    | 10,00 | 10,00 |
| 4,00    | 1,21    | 2 | 1 | 8    | 4,4    | 10,00   | 10,00 | 10,00 |
| 17,00   | 1,85    | 2 | 1 | 9999 | 3,7    | 2,00    | 10,00 | 10,00 |
| 9999,00 | 9999,00 | 1 | 1 | 18   | 3,5    | 0,00    | 0,00  | 0,00  |
| 5,00    | 1,14    | 1 | 1 | 22   | 3,8    | 10,00   | 10,00 | 10,00 |
| 6,00    | 2,27    | 2 | 1 | 12   | 7,1    | 8,80    | 10,00 | 10,00 |
| 8,00    | 7,18    | 1 | 1 | 25   | 2,7    | 9999,00 | 10,00 | 10,00 |
| 3,00    | 3,41    | 1 | 0 | 19   | 4,4    | 3,16    | 10,00 | 10,00 |
| 22,00   | 10,17   | 1 | 0 | 36   | 3,2    | 10,00   | 10,00 | 10,00 |
| 5,00    | 11,87   | 1 | 0 | 35   | 3,7    | 3,31    | 10,00 | 10,00 |
| 9999,00 | 9999,00 | 1 | 0 | 28   | 2,9    | 9,50    | 10,00 | 10,00 |
| 35,00   | 4,91    | 2 | 1 | 6    | 7,5    | 9999,00 | 10,00 | 10,00 |
| 9,00    | 2,78    | 2 | 1 | 5    | 4,0    | 0,00    | 10,00 | 0,00  |
| 9999,00 | 9999,00 | 2 | 1 | 6    | 6,3    | 9999,00 | 10,00 | 10,00 |
| 9999,00 | 9999,00 | 1 | 1 | 23   | 4,1    | 3,00    | 10,00 | 10,00 |
| 2,00    | 16,63   | 2 | 1 | 7    | 2,8    | 1,00    | 10,00 | 10,00 |

|         |         |   |   |    |        |         |       |       |
|---------|---------|---|---|----|--------|---------|-------|-------|
| 12,00   | 10,59   | 1 | 0 | 38 | 1,9    | 10,00   | 10,00 | 10,00 |
| 17,00   | 28,00   | 1 | 0 | 18 | 2,4    | 10,00   | 10,00 | 10,00 |
| 10,00   | 5,43    | 2 | 1 | 11 | 4,8    | 10,00   | 10,00 | 10,00 |
| 3,00    | 1,42    | 1 | 1 | 15 | 9999,0 | 0,00    | 0,00  | 0,00  |
| 2,00    | 3,45    | 1 | 1 | 16 | 4,0    | 8,00    | 10,00 | 10,00 |
| 3,00    | 5,71    | 2 | 1 | 8  | 5,5    | 9999,00 | 10,00 | 10,00 |
| 4,00    | 3,87    | 1 | 1 | 17 | 4,5    | 0,00    | 10,00 | 10,00 |
| 9999,00 | 9999,00 | 2 | 1 | 8  | 7,5    | 10,00   | 10,00 | 10,00 |
| 5,00    | 3,46    | 2 | 1 | 5  | 6,0    | 0,00    | 8,00  | 6,00  |
| 18,00   | 3,55    | 2 | 0 | 20 | 3,0    | 3,72    | 10,00 | 10,00 |
| 10,00   | 1,40    | 2 | 0 | 20 | 2,1    | 10,00   | 10,00 | 10,00 |
| 9999,00 | 9999,00 | 2 | 0 | 18 | 2,3    | 10,00   | 10,00 | 10,00 |
| 17,00   | 20,18   | 1 | 0 | 34 | 2,4    | 10,00   | 10,00 | 10,00 |
| 35,00   | 5,76    | 1 | 0 | 31 | 3,1    | 10,00   | 10,00 | 10,00 |
| 9,00    | 6,11    | 2 | 0 | 24 | 3,0    | 10,00   | 10,00 | 10,00 |
| 8,00    | 10,38   | 2 | 0 | 18 | 2,6    | 10,00   | 10,00 | 10,00 |
| 8,00    | 16,08   | 1 | 0 | 24 | 2,8    | 4,84    | 10,00 | 10,00 |
| 20,00   | 1,70    | 2 | 0 | 10 | 3,7    | 10,00   | 10,00 | 10,00 |
| 9999,00 | 6,39    | 1 | 0 | 11 | 4,5    | 10,00   | 10,00 | 10,00 |
| 9999,00 | 5,83    | 2 | 0 | 20 | 3,8    | 10,00   | 10,00 | 10,00 |
| 25,00   | 1,70    | 2 | 0 | 18 | 3,9    | 10,00   | 10,00 | 10,00 |
| 9999,00 | 9999,00 | 1 | 0 | 23 | 3,0    | 10,00   | 10,00 | 10,00 |
| 9999,00 | 9999,00 | 1 | 1 | 14 | 2,8    | 7,00    | 10,00 | 10,00 |
| 9999,00 | 9999,00 | 2 | 1 | 9  | 6,3    | 0,50    | 10,00 | 10,00 |
| 16,00   | 12,50   | 2 | 0 | 13 | 2,3    | 10,00   | 10,00 | 10,00 |
| 12,00   | 7,25    | 2 | 0 | 18 | 2,8    | 10,00   | 10,00 | 10,00 |
| 8,00    | 12,36   | 1 | 0 | 42 | 2,1    | 10,00   | 10,00 | 10,00 |
| 8,00    | 7,24    | 2 | 0 | 24 | 2,8    | 4,30    | 10,00 | 10,00 |
| 9999,00 | 0,80    | 2 | 1 | 14 | 2,8    | 2,47    | 10,00 | 3,72  |
| 9999,00 | 9,45    | 2 | 1 | 25 | 9999,0 | 10,00   | 10,00 | 10,00 |
| 7,00    | 4,95    | 1 | 0 | 30 | 3,3    | 10,00   | 10,00 | 10,00 |
| 35,00   | 0,60    | 2 | 0 | 14 | 6,4    | 10,00   | 10,00 | 10,00 |
| 0,50    | 0,90    | 2 | 0 | 20 | 3,1    | 3,41    | 10,00 | 10,00 |
| 14,00   | 0,34    | 2 | 1 | 18 | 4,4    | 5,62    | 10,00 | 10,00 |
| 3,00    | 0,54    | 2 | 1 | 16 | 5,9    | 0,00    | 10,00 | 1,00  |
| 4,00    | 1,19    | 2 | 1 | 12 | 9999,0 | 0,00    | 10,00 | 10,00 |
| 3,00    | 2,26    | 2 | 1 | 13 | 6,2    | 0,00    | 10,00 | 10,00 |
| 5,00    | 38,35   | 2 | 1 | 26 | 4,1    | 10,00   | 10,00 | 10,00 |
| 7,00    | 0,00    | 2 | 1 | 12 | 9,8    | 8,50    | 10,00 | 10,00 |
| 17,00   | 4,80    | 2 | 1 | 8  | 7,9    | 1,00    | 10,00 | 10,00 |
| 1,00    | 2,87    | 1 | 1 | 25 | 4,3    | 2,00    | 10,00 | 10,00 |
| 8,00    | 6,32    | 1 | 0 | 36 | 2,2    | 10,00   | 10,00 | 10,00 |
| 10,00   | 5,68    | 1 | 0 | 48 | 1,6    | 10,00   | 10,00 | 10,00 |
| 5,00    | 2,58    | 2 | 0 | 26 | 2,3    | 10,00   | 10,00 | 10,00 |
| 15,00   | 4,00    | 1 | 0 | 36 | 2,0    | 10,00   | 10,00 | 10,00 |
| 9,00    | 36,41   | 1 | 0 | 50 | 2,1    | 10,00   | 10,00 | 10,00 |

| TCRaantal | TCRtime | MPInspma: | MPExpmax | piekflowm: | lengtecm | LGkg  | waterperc | impedantie |
|-----------|---------|-----------|----------|------------|----------|-------|-----------|------------|
| 0,00      | 9999,00 | 31,67     | 54,95    | 460,00     | 166,0    | 86,1  | 39,80     | 621,00     |
| 5,00      | 12,50   | 58,52     | 85,16    | 400,00     | 150,0    | 61,4  | 46,50     | 619,00     |
| 0,00      | 9999,00 | 41,76     | 80,40    | 480,00     | 158,0    | 78,4  | 42,00     | 584,00     |
| 0,00      | 9999,00 | 20,02     | 33,30    | 370,00     | 150,0    | 66,5  | 47,40     | 544,00     |
| 0,00      | 9999,00 | 55,57     | 127,55   | 450,00     | 161,0    | 108,2 | 40,80     | 508,00     |
| 5,00      | 24,60   | 31,92     | 72,57    | 250,00     | 162,0    | 78,1  | 46,70     | 612,00     |
| 0,00      | 9999,00 | 18,64     | 50,25    | 250,00     | 145,0    | 47,0  | 77,40     | 347,00     |
| 9999,00   | 9999,00 | 16,48     | 94,28    | 260,00     | 150,0    | 75,8  | 44,70     | 487,00     |
| 0,00      | 9999,00 | 9999,00   | 9999,00  | 190,00     | 148,0    | 61,9  | 43,60     | 705,00     |
| 5,00      | 2,10    | 96,51     | 133,30   | 550,00     | 172,0    | 75,6  | 55,20     | 521,00     |
| 5,00      | 15,05   | 37,22     | 70,34    | 550,00     | 176,0    | 77,4  | 51,20     | 611,00     |
| 5,00      | 11,10   | 55,52     | 118,59   | 690,00     | 173,0    | 75,8  | 54,40     | 548,00     |
| 5,00      | 17,80   | 9999,00   | 9999,00  | 9999,00    | 159,0    | 63,3  | 54,50     | 588,00     |
| 5,00      | 13,50   | 78,97     | 105,69   | 490,00     | 167,0    | 65,9  | 58,90     | 528,00     |
| 5,00      | 11,30   | 82,66     | 75,60    | 410,00     | 155,0    | 69,6  | 46,40     | 552,00     |
| 5,00      | 10,50   | 113,35    | 171,00   | 630,00     | 171,0    | 75,2  | 50,90     | 604,00     |
| 5,00      | 11,50   | 129,51    | 124,89   | 720,00     | 169,0    | 86,6  | 55,40     | 416,00     |
| 5,00      | 12,60   | 39,77     | 96,27    | 650,00     | 170,0    | 69,9  | 58,70     | 514,00     |
| 5,00      | 16,40   | 68,42     | 123,40   | 500,00     | 159,0    | 68,5  | 49,60     | 523,00     |
| 5,00      | 8,70    | 69,50     | 111,34   | 520,00     | 169,0    | 67,6  | 64,90     | 444,00     |
| 5,00      | 10,00   | 88,76     | 114,04   | 660,00     | 169,0    | 75,6  | 52,00     | 563,00     |
| 5,00      | 10,50   | 120,76    | 119,65   | 670,00     | 171,0    | 68,6  | 55,40     | 586,00     |
| 5,00      | 11,50   | 9999,00   | 9999,00  | 510,00     | 166,0    | 72,6  | 62,80     | 408,00     |
| 5,00      | 10,90   | 67,96     | 96,52    | 550,00     | 170,0    | 95,1  | 57,60     | 340,00     |
| 5,00      | 19,00   | 49,77     | 63,97    | 390,00     | 165,0    | 75,0  | 46,10     | 564,00     |
| 5,00      | 10,70   | 57,64     | 97,01    | 430,00     | 158,0    | 58,3  | 50,60     | 624,00     |
| 5,00      | 14,00   | 49,71     | 97,03    | 380,00     | 174,0    | 97,2  | 52,40     | 420,00     |
| 5,00      | 8,80    | 61,32     | 99,40    | 600,00     | 173,0    | 80,1  | 51,10     | 569,00     |
| 5,00      | 19,80   | 37,73     | 90,39    | 350,00     | 159,0    | 77,7  | 42,10     | 597,00     |
| 5,00      | 13,20   | 91,24     | 122,44   | 480,00     | 164,0    | 82,6  | 55,10     | 361,00     |
| 5,00      | 9,60    | 72,09     | 89,47    | 500,00     | 156,0    | 65,2  | 45,10     | 645,00     |
| 5,00      | 12,60   | 73,51     | 154,97   | 450,00     | 162,0    | 58,0  | 49,50     | 701,00     |
| 5,00      | 10,00   | 89,92     | 130,91   | 480,00     | 166,0    | 65,8  | 53,50     | 527,00     |
| 5,00      | 9,20    | 72,44     | 110,37   | 340,00     | 166,0    | 74,7  | 49,30     | 511,00     |
| 5,00      | 11,50   | 84,80     | 103,31   | 410,00     | 159,0    | 68,8  | 48,50     | 550,00     |
| 5,00      | 29,00   | 9999,00   | 9999,00  | 9999,00    | 176,0    | 126,5 | 42,70     | 447,00     |
| 5,00      | 18,57   | 58,47     | 83,64    | 380,00     | 165,0    | 70,8  | 45,90     | 623,00     |
| 5,00      | 17,91   | 9999,00   | 9999,00  | 9999,00    | 160,0    | 65,2  | 55,50     | 548,00     |
| 0,00      | 9999,00 | 27,19     | 73,01    | 320,00     | 159,0    | 72,1  | 40,20     | 739,00     |
| 0,00      | 9999,00 | 26,50     | 55,97    | 150,00     | 144,0    | 61,7  | 42,80     | 684,00     |
| 0,00      | 9999,00 | 41,74     | 49,53    | 200,00     | 156,0    | 49,7  | 9999,00   | 9999,00    |
| 0,00      | 9999,00 | 75,49     | 117,25   | 480,00     | 174,0    | 81,5  | 51,80     | 544,00     |
| 5,00      | 14,78   | 87,18     | 101,79   | 370,00     | 156,0    | 70,4  | 49,00     | 495,00     |
| 0,00      | 9999,00 | 36,85     | 98,02    | 400,00     | 166,0    | 68,0  | 54,10     | 585,00     |
| 0,00      | 9999,00 | 16,84     | 26,56    | 100,00     | 140,0    | 56,7  | 45,30     | 658,00     |
| 0,00      | 9999,00 | 39,30     | 64,38    | 240,00     | 154,0    | 121,0 | 36,00     | 404,00     |
| 0,00      | 9999,00 | 48,85     | 97,21    | 270,00     | 156,0    | 72,0  | 42,10     | 643,00     |
| 5,00      | 31,00   | 16,42     | 81,27    | 350,00     | 151,0    | 75,1  | 39,70     | 641,00     |
| 9999,00   | 9999,00 | 20,54     | 46,42    | 320,00     | 158,0    | 72,7  | 45,10     | 565,00     |

|      |         |         |         |         |       |       |         |         |
|------|---------|---------|---------|---------|-------|-------|---------|---------|
| 0,00 | 9999,00 | 20,54   | 46,42   | 320,00  | 162,0 | 75,0  | 41,30   | 678,00  |
| 5,00 | 31,50   | 87,57   | 116,74  | 340,00  | 181,0 | 104,5 | 51,20   | 430,00  |
| 5,00 | 14,90   | 9999,00 | 9999,00 | 400,00  | 159,0 | 83,8  | 40,10   | 587,00  |
| 5,00 | 31,20   | 38,66   | 49,86   | 180,00  | 154,0 | 99,4  | 37,10   | 499,00  |
| 0,00 | 9999,00 | 28,87   | 41,21   | 90,00   | 156,0 | 60,0  | 46,00   | 674,00  |
| 5,00 | 17,90   | 9999,00 | 9999,00 | 9999,00 | 178,0 | 73,6  | 53,80   | 567,00  |
| 0,00 | 9999,00 | 9999,00 | 9999,00 | 9999,00 | 156,0 | 79,4  | 41,90   | 618,00  |
| 0,00 | 9999,00 | 9,66    | 29,01   | 9999,00 | 152,0 | 61,7  | 9999,00 | 9999,00 |
| 0,00 | 9999,00 | 22,87   | 38,26   | 170,00  | 157,0 | 68,8  | 50,60   | 490,00  |
| 0,00 | 9999,00 | 9999,00 | 9999,00 | 185,00  | 153,0 | 55,7  | 57,10   | 508,00  |
| 5,00 | 25,50   | 19,76   | 38,63   | 230,00  | 172,0 | 92,5  | 53,20   | 439,00  |
| 0,00 | 9999,00 | 14,18   | 73,35   | 100,00  | 154,0 | 63,6  | 49,50   | 550,00  |
| 0,00 | 9999,00 | 44,98   | 57,46   | 210,00  | 161,0 | 67,8  | 45,40   | 647,00  |
| 0,00 | 9999,00 | 16,51   | 78,35   | 280,00  | 154,0 | 73,5  | 45,70   | 515,00  |
| 0,00 | 9999,00 | 41,83   | 48,18   | 220,00  | 154,0 | 86,0  | 51,00   | 342,00  |
| 0,00 | 9999,00 | 23,28   | 36,44   | 200,00  | 143,0 | 40,4  | 58,20   | 711,00  |
| 0,00 | 9999,00 | 28,74   | 58,42   | 280,00  | 175,0 | 104,1 | 41,40   | 613,00  |
| 0,00 | 9999,00 | 42,33   | 110,31  | 490,00  | 180,0 | 100,7 | 52,00   | 435,00  |
| 0,00 | 9999,00 | 32,99   | 78,05   | 360,00  | 161,0 | 73,2  | 43,20   | 635,00  |
| 0,00 | 9999,00 | 15,07   | 49,57   | 130,00  | 156,0 | 82,0  | 44,30   | 486,00  |
| 0,00 | 9999,00 | 7,19    | 33,15   | 120,00  | 163,0 | 65,7  | 47,00   | 648,00  |
| 0,00 | 9999,00 | 44,96   | 35,21   | 170,00  | 158,0 | 78,8  | 44,70   | 519,00  |
| 0,00 | 9999,00 | 8,12    | 47,90   | 160,00  | 156,0 | 53,7  | 52,80   | 636,00  |
| 5,00 | 15,00   | 31,97   | 92,50   | 200,00  | 142,0 | 53,0  | 53,80   | 599,00  |
| 0,00 | 9999,00 | 32,11   | 68,41   | 220,00  | 150,0 | 82,0  | 41,00   | 511,00  |
| 0,00 | 9999,00 | 12,65   | 49,70   | 200,00  | 158,0 | 63,1  | 47,10   | 678,00  |
| 0,00 | 9999,00 | 22,29   | 35,34   | 180,00  | 159,0 | 80,4  | 42,00   | 587,00  |
| 0,00 | 9999,00 | 11,62   | 31,98   | 70,00   | 157,0 | 93,0  | 35,30   | 655,00  |
| 0,00 | 9999,00 | 57,24   | 55,12   | 290,00  | 154,0 | 86,4  | 39,20   | 563,00  |
| 0,00 | 9999,00 | 26,61   | 44,86   | 80,00   | 152,0 | 67,1  | 40,50   | 753,00  |
| 0,00 | 9999,00 | 11,99   | 35,38   | 250,00  | 165,0 | 78,5  | 49,30   | 572,00  |
| 0,00 | 9999,00 | 21,19   | 52,23   | 350,00  | 160,0 | 91,8  | 49,90   | 428,00  |
| 0,00 | 9999,00 | 25,09   | 75,42   | 160,00  | 148,0 | 68,0  | 49,90   | 557,00  |
| 0,00 | 9999,00 | 11,19   | 30,34   | 150,00  | 147,0 | 87,6  | 38,30   | 536,00  |
| 0,00 | 9999,00 | 76,96   | 91,58   | 470,00  | 174,0 | 82,0  | 47,00   | 650,00  |
| 0,00 | 9999,00 | 25,95   | 65,45   | 90,00   | 153,0 | 52,9  | 58,70   | 531,00  |
| 0,00 | 9999,00 | 55,72   | 103,50  | 300,00  | 159,0 | 69,0  | 47,00   | 567,00  |
| 0,00 | 9999,00 | 15,28   | 79,55   | 270,00  | 158,0 | 70,6  | 58,60   | 444,00  |
| 5,00 | 27,00   | 83,00   | 84,17   | 410,00  | 158,0 | 61,9  | 54,30   | 624,00  |
| 5,00 | 12,50   | 43,87   | 98,47   | 300,00  | 154,0 | 74,4  | 50,10   | 437,00  |
| 0,00 | 9999,00 | 9999,00 | 9999,00 | 9999,00 | 173,0 | 75,5  | 54,00   | 547,00  |
| 5,00 | 18,20   | 86,90   | 110,94  | 470,00  | 164,0 | 69,8  | 63,20   | 415,00  |
| 5,00 | 8,90    | 73,03   | 99,37   | 500,00  | 168,0 | 57,5  | 61,00   | 607,00  |
| 5,00 | 9,00    | 53,00   | 103,89  | 370,00  | 169,0 | 79,9  | 49,10   | 584,00  |
| 5,00 | 18,95   | 54,24   | 101,25  | 430,00  | 162,0 | 65,2  | 55,50   | 569,00  |
| 0,00 | 9999,00 | 23,29   | 63,13   | 250,00  | 164,0 | 103,4 | 43,30   | 401,00  |
| 0,00 | 9999,00 | 17,53   | 34,14   | 120,00  | 151,0 | 86,5  | 39,90   | 510,00  |
| 0,00 | 9999,00 | 15,26   | 42,03   | 200,00  | 157,0 | 68,5  | 47,40   | 556,00  |
| 0,00 | 9999,00 | 48,89   | 97,51   | 470,00  | 175,0 | 74,5  | 56,90   | 520,00  |
| 0,00 | 9999,00 | 30,48   | 66,31   | 270,00  | 165,0 | 104,1 | 36,20   | 579,00  |



|         |         |         |         |         |       |       |         |         |
|---------|---------|---------|---------|---------|-------|-------|---------|---------|
| 5,00    | 12,05   | 112,13  | 131,30  | 440,00  | 170,0 | 81,5  | 56,70   | 438,00  |
| 5,00    | 11,95   | 69,08   | 159,45  | 500,00  | 166,0 | 67,5  | 58,40   | 517,00  |
| 5,00    | 46,00   | 55,58   | 56,61   | 250,00  | 156,0 | 65,5  | 43,90   | 685,00  |
| 0,00    | 9999,00 | 8,76    | 26,59   | 9999,00 | 155,0 | 74,5  | 47,20   | 589,00  |
| 5,00    | 17,00   | 68,03   | 86,22   | 370,00  | 170,0 | 70,0  | 57,40   | 532,00  |
| 0,00    | 9999,00 | 9999,00 | 9999,00 | 9999,00 | 149,0 | 65,0  | 9999,00 | 9999,00 |
| 0,00    | 9999,00 | 47,91   | 58,60   | 600,00  | 169,0 | 72,6  | 54,70   | 542,00  |
| 0,00    | 9999,00 | 16,89   | 69,92   | 300,00  | 150,0 | 65,0  | 44,60   | 623,00  |
| 0,00    | 9999,00 | 39,68   | 63,95   | 130,00  | 155,0 | 72,6  | 53,20   | 405,00  |
| 5,00    | 11,50   | 41,88   | 94,17   | 230,00  | 159,0 | 101,1 | 37,60   | 503,00  |
| 5,00    | 11,80   | 41,08   | 118,88  | 400,00  | 157,0 | 78,1  | 44,30   | 522,00  |
| 5,00    | 15,00   | 37,98   | 77,89   | 360,00  | 160,0 | 76,6  | 42,60   | 602,00  |
| 5,00    | 16,00   | 72,05   | 118,84  | 580,00  | 172,0 | 79,3  | 56,20   | 471,00  |
| 5,00    | 14,50   | 59,25   | 91,18   | 270,00  | 172,0 | 81,8  | 54,20   | 485,00  |
| 5,00    | 13,00   | 57,54   | 64,83   | 330,00  | 167,0 | 91,4  | 42,30   | 512,00  |
| 5,00    | 17,20   | 86,35   | 105,95  | 450,00  | 159,0 | 115,6 | 35,60   | 463,00  |
| 5,00    | 16,00   | 97,84   | 81,08   | 550,00  | 177,0 | 72,9  | 58,20   | 533,00  |
| 5,00    | 32,00   | 23,70   | 45,58   | 230,00  | 157,0 | 87,4  | 41,60   | 498,00  |
| 0,00    | 9999,00 | 23,67   | 82,56   | 350,00  | 171,0 | 98,7  | 46,70   | 497,00  |
| 5,00    | 14,00   | 71,35   | 101,71  | 490,00  | 158,0 | 102,5 | 36,90   | 511,00  |
| 5,00    | 13,00   | 27,85   | 110,05  | 380,00  | 168,0 | 87,9  | 44,80   | 494,00  |
| 5,00    | 14,00   | 55,42   | 98,75   | 390,00  | 177,0 | 84,1  | 69,30   | 328,00  |
| 0,00    | 9999,00 | 26,78   | 90,25   | 420,00  | 160,0 | 67,2  | 53,10   | 573,00  |
| 0,00    | 9999,00 | 31,74   | 53,71   | 350,00  | 159,0 | 71,4  | 41,90   | 688,00  |
| 5,00    | 15,10   | 9999,00 | 9999,00 | 320,00  | 160,0 | 59,3  | 57,70   | 497,00  |
| 5,00    | 41,45   | 38,00   | 63,28   | 360,00  | 153,0 | 60,9  | 49,00   | 579,00  |
| 5,00    | 14,56   | 35,13   | 93,14   | 560,00  | 171,0 | 88,5  | 55,70   | 410,00  |
| 5,00    | 35,86   | 45,18   | 45,78   | 330,00  | 164,0 | 70,8  | 47,20   | 575,00  |
| 5,00    | 10,53   | 28,82   | 36,45   | 280,00  | 159,0 | 83,0  | 36,90   | 711,00  |
| 5,00    | 11,88   | 65,70   | 97,41   | 460,00  | 158,0 | 84,6  | 41,30   | 538,00  |
| 5,00    | 7,00    | 81,10   | 85,27   | 490,00  | 175,0 | 82,0  | 51,80   | 469,00  |
| 5,00    | 48,00   | 14,84   | 27,51   | 380,00  | 160,0 | 65,8  | 56,40   | 448,00  |
| 5,00    | 19,00   | 53,28   | 64,79   | 250,00  | 155,0 | 81,9  | 41,60   | 534,00  |
| 5,00    | 11,25   | 32,66   | 54,56   | 180,00  | 155,0 | 80,6  | 46,40   | 445,00  |
| 0,00    | 9999,00 | 14,19   | 12,03   | 110,00  | 163,0 | 60,8  | 53,00   | 579,00  |
| 9999,00 | 9999,00 | 7,78    | 18,96   | 150,00  | 157,0 | 70,6  | 45,90   | 566,00  |
| 5,00    | 24,00   | 23,06   | 33,31   | 160,00  | 151,0 | 75,5  | 43,40   | 526,00  |
| 5,00    | 32,31   | 13,04   | 48,82   | 320,00  | 162,0 | 112,8 | 33,70   | 564,00  |
| 2,00    | 27,75   | 46,42   | 48,72   | 224,00  | 153,0 | 76,0  | 42,30   | 578,00  |
| 5,00    | 40,06   | 40,05   | 47,82   | 9999,00 | 148,0 | 60,8  | 43,60   | 709,00  |
| 5,00    | 12,25   | 9999,00 | 9999,00 | 150,00  | 163,0 | 74,0  | 52,30   | 529,00  |
| 5,00    | 10,00   | 11,07   | 12,31   | 575,00  | 178,0 | 69,0  | 64,70   | 474,00  |
| 5,00    | 10,18   | 14,89   | 38,12   | 560,00  | 174,0 | 78,7  | 50,40   | 599,00  |
| 5,00    | 12,25   | 5,67    | 4,87    | 140,00  | 161,0 | 88,0  | 41,00   | 536,00  |
| 5,00    | 9,78    | 6,19    | 17,38   | 270,00  | 162,0 | 79,6  | 48,00   | 565,00  |
| 5,00    | 13,36   | 6,85    | 18,98   | 600,00  | 177,0 | 82,9  | 59,00   | 433,00  |

| Baeckehuis | Baeckespoor | BaeckeVrij | laagsteVPT | laagsteVPT | hoogsteVP | laagsteVPT | laagsteVPT | hoogsteVP |
|------------|-------------|------------|------------|------------|-----------|------------|------------|-----------|
| 1,70       | 2,87        | 6,96       | 16,0       | 18,0       | 18,0      | 17,0       | 24,0       | 24,0      |
| 1,80       | 4,40        | 1,09       | 18,0       | 15,0       | 18,0      | 10,0       | 17,0       | 17,0      |
| 0,60       | 1,23        | 1,23       | 19,0       | 24,0       | 24,0      | 30,0       | 30,0       | 30,0      |
| 0,70       | 0,19        | 2,32       | 9999,0     | 9999,0     | 9999,0    | 9999,0     | 9999,0     | 9999,0    |
| 1,20       | 0,00        | 1,14       | 26,0       | 22,0       | 26,0      | 35,0       | 32,0       | 35,0      |
| 0,30       | 0,00        | 7,54       | 18,0       | 18,0       | 18,0      | 22,0       | 20,0       | 22,0      |
| 0,10       | 0,00        | 1,14       | 20,0       | 23,0       | 23,0      | 19,0       | 18,0       | 19,0      |
| 0,00       | 0,00        | 2,66       | 38,0       | 31,0       | 38,0      | 32,0       | 24,0       | 32,0      |
| 9999,00    | 9999,00     | 9999,00    | 18,0       | 16,0       | 18,0      | 30,0       | 18,0       | 30,0      |
| 2,10       | 0,00        | 3,84       | 17,0       | 18,0       | 18,0      | 22,0       | 20,0       | 22,0      |
| 2,30       | 5,58        | 0,00       | 21,0       | 26,0       | 26,0      | 35,0       | 31,0       | 35,0      |
| 2,20       | 2,61        | 0,00       | 19,0       | 20,0       | 20,0      | 29,0       | 17,0       | 29,0      |
| 1,10       | 0,00        | 10,74      | 21,0       | 20,0       | 21,0      | 20,0       | 19,0       | 20,0      |
| 1,50       | 7,82        | 0,00       | 18,0       | 20,0       | 20,0      | 18,0       | 17,0       | 18,0      |
| 3,00       | 3,68        | 0,00       | 10,0       | 10,0       | 10,0      | 11,0       | 15,0       | 15,0      |
| 2,10       | 0,00        | 1,69       | 23,0       | 14,0       | 23,0      | 25,0       | 16,0       | 25,0      |
| 1,70       | 2,87        | 9,78       | 20,0       | 20,0       | 20,0      | 20,0       | 25,0       | 25,0      |
| 1,80       | 11,30       | 5,66       | 20,0       | 20,0       | 20,0      | 12,0       | 15,0       | 15,0      |
| 9999,00    | 9999,00     | 9999,00    | 19,0       | 20,0       | 20,0      | 19,0       | 20,0       | 20,0      |
| 9999,00    | 9999,00     | 9999,00    | 10,0       | 15,0       | 15,0      | 12,0       | 12,0       | 12,0      |
| 1,40       | 1,98        | 6,09       | 17,0       | 13,0       | 17,0      | 30,0       | 20,0       | 30,0      |
| 1,40       | 1,23        | 11,51      | 13,0       | 25,0       | 25,0      | 14,0       | 20,0       | 20,0      |
| 9999,00    | 9999,00     | 9999,00    | 11,0       | 15,0       | 15,0      | 14,0       | 13,0       | 14,0      |
| 2,30       | 0,00        | 7,21       | 10,0       | 19,0       | 19,0      | 30,0       | 29,0       | 30,0      |
| 9999,00    | 9999,00     | 9999,00    | 14,0       | 14,0       | 14,0      | 29,0       | 30,0       | 30,0      |
| 1,90       | 4,09        | 3,12       | 20,0       | 15,0       | 20,0      | 23,0       | 15,0       | 23,0      |
| 2,20       | 13,04       | 0,00       | 30,0       | 30,0       | 30,0      | 30,0       | 32,0       | 32,0      |
| 2,20       | 1,23        | 8,10       | 15,0       | 20,0       | 20,0      | 15,0       | 19,0       | 19,0      |
| 9999,00    | 9999,00     | 9999,00    | 20,0       | 32,0       | 32,0      | 34,0       | 34,0       | 34,0      |
| 2,00       | 0,00        | 3,84       | 14,0       | 13,0       | 14,0      | 20,0       | 21,0       | 21,0      |
| 9999,00    | 9999,00     | 9999,00    | 17,0       | 15,0       | 17,0      | 19,0       | 15,0       | 19,0      |
| 9999,00    | 9999,00     | 9999,00    | 20,0       | 21,0       | 21,0      | 18,0       | 19,0       | 19,0      |
| 2,70       | 9,56        | 19,93      | 17,0       | 18,0       | 18,0      | 20,0       | 19,0       | 20,0      |
| 1,90       | 4,50        | 2,16       | 9,0        | 15,0       | 15,0      | 29,0       | 28,0       | 29,0      |
| 9999,00    | 9999,00     | 9999,00    | 14,0       | 15,0       | 15,0      | 19,0       | 18,0       | 19,0      |
| 0,00       | 0,00        | 1,36       | 26,0       | 40,0       | 40,0      | 31,0       | 28,0       | 31,0      |
| 1,90       | 1,88        | 0,00       | 16,0       | 24,0       | 24,0      | 24,0       | 36,0       | 36,0      |
| 0,65       | 9999,00     | 9999,00    | 20,0       | 15,0       | 20,0      | 19,0       | 20,0       | 20,0      |
| 0,40       | 1,23        | 2,32       | 48,0       | 50,0       | 50,0      | 45,0       | 50,0       | 50,0      |
| 0,00       | 0,00        | 1,14       | 35,0       | 35,0       | 35,0      | 38,0       | 38,0       | 38,0      |
| 0,00       | 2,61        | 3,01       | 40,0       | 50,0       | 50,0      | 50,0       | 50,0       | 50,0      |
| 0,40       | 0,00        | 2,76       | 9999,0     | 9999,0     | 9999,0    | 9999,0     | 9999,0     | 9999,0    |
| 9999,00    | 9999,00     | 9999,00    | 50,0       | 40,0       | 50,0      | 43,0       | 28,0       | 43,0      |
| 0,50       | 0,00        | 0,41       | 38,0       | 25,0       | 38,0      | 28,0       | 35,0       | 35,0      |
| 9999,00    | 9999,00     | 9999,00    | 50,0       | 50,0       | 50,0      | 22,0       | 38,0       | 38,0      |
| 0,40       | 0,97        | 1,82       | 50,0       | 50,0       | 50,0      | 50,0       | 36,0       | 50,0      |
| 0,00       | 0,87        | 0,97       | 30,0       | 9999,0     | 30,0      | 20,0       | 50,0       | 50,0      |
| 0,90       | 0,00        | 3,28       | 40,0       | 20,0       | 40,0      | 40,0       | 40,0       | 40,0      |
| 9999,00    | 9999,00     | 9999,00    | 32,0       | 44,0       | 44,0      | 50,0       | 48,0       | 50,0      |

|         |         |         |        |        |        |        |        |        |
|---------|---------|---------|--------|--------|--------|--------|--------|--------|
| 9999,00 | 9999,00 | 9999,00 | 20,0   | 19,0   | 20,0   | 21,0   | 25,0   | 25,0   |
| 1,40    | 2,69    | 0,81    | 30,0   | 50,0   | 50,0   | 50,0   | 9999,0 | 50,0   |
| 0,00    | 4,35    | 5,49    | 25,0   | 20,0   | 25,0   | 40,0   | 19,0   | 40,0   |
| 0,50    | 0,00    | 9999,00 | 21,0   | 28,0   | 28,0   | 30,0   | 30,0   | 30,0   |
| 0,00    | 0,00    | 1,14    | 6,0    | 10,0   | 10,0   | 7,0    | 6,0    | 7,0    |
| 0,00    | 0,00    | 1,14    | 42,0   | 40,0   | 42,0   | 9999,0 | 9999,0 | 9999,0 |
| 0,00    | 0,00    | 6,32    | 16,0   | 13,0   | 16,0   | 18,0   | 14,0   | 18,0   |
| 0,00    | 0,00    | 3,19    | 36,0   | 30,0   | 36,0   | 50,0   | 25,0   | 50,0   |
| 0,00    | 0,00    | 1,14    | 18,0   | 19,0   | 19,0   | 26,0   | 22,0   | 26,0   |
| 9999,00 | 9999,00 | 9999,00 | 40,0   | 24,0   | 40,0   | 50,0   | 48,0   | 50,0   |
| 0,40    | 0,00    | 5,96    | 14,0   | 19,0   | 19,0   | 20,0   | 14,0   | 20,0   |
| 0,40    | 0,00    | 3,76    | 24,0   | 46,0   | 46,0   | 49,0   | 46,0   | 49,0   |
| 0,80    | 6,09    | 0,10    | 50,0   | 38,0   | 50,0   | 50,0   | 50,0   | 50,0   |
| 0,00    | 0,00    | 1,65    | 22,0   | 28,0   | 28,0   | 28,0   | 50,0   | 50,0   |
| 0,00    | 0,00    | 0,00    | 30,0   | 20,0   | 30,0   | 18,0   | 20,0   | 20,0   |
| 0,00    | 0,00    | 1,14    | 20,0   | 50,0   | 50,0   | 50,0   | 50,0   | 50,0   |
| 0,00    | 0,00    | 1,77    | 9999,0 | 9999,0 | 9999,0 | 9999,0 | 9999,0 | 9999,0 |
| 0,10    | 9,05    | 0,46    | 9999,0 | 9999,0 | 9999,0 | 9999,0 | 9999,0 | 9999,0 |
| 0,40    | 2,61    | 1,14    | 9999,0 | 9999,0 | 9999,0 | 9999,0 | 9999,0 | 9999,0 |
| 0,00    | 0,00    | 1,61    | 9999,0 | 9999,0 | 9999,0 | 9999,0 | 9999,0 | 9999,0 |
| 0,00    | 0,00    | 0,00    | 9999,0 | 9999,0 | 9999,0 | 9999,0 | 9999,0 | 9999,0 |
| 0,00    | 0,00    | 4,45    | 9999,0 | 9999,0 | 9999,0 | 9999,0 | 9999,0 | 9999,0 |
| 0,00    | 0,00    | 1,89    | 9999,0 | 9999,0 | 9999,0 | 9999,0 | 9999,0 | 9999,0 |
| 0,00    | 0,00    | 2,00    | 50,0   | 50,0   | 50,0   | 50,0   | 9999,0 | 50,0   |
| 0,00    | 0,00    | 1,14    | 30,0   | 40,0   | 40,0   | 40,0   | 50,0   | 50,0   |
| 0,00    | 0,00    | 1,78    | 20,0   | 20,0   | 20,0   | 20,0   | 30,0   | 30,0   |
| 0,00    | 0,00    | 1,77    | 31,0   | 30,0   | 31,0   | 50,0   | 9999,0 | 50,0   |
| 0,00    | 0,00    | 0,00    | 9999,0 | 9999,0 | 9999,0 | 9999,0 | 9999,0 | 9999,0 |
| 0,60    | 0,00    | 3,12    | 37,0   | 20,0   | 37,0   | 50,0   | 36,0   | 50,0   |
| 9999,00 | 9999,00 | 9999,00 | 16,0   | 30,0   | 30,0   | 38,0   | 32,0   | 38,0   |
| 0,00    | 0,00    | 0,34    | 50,0   | 50,0   | 50,0   | 50,0   | 9999,0 | 50,0   |
| 0,70    | 0,00    | 1,77    | 40,0   | 20,0   | 40,0   | 9999,0 | 50,0   | 50,0   |
| 9999,00 | 9999,00 | 9999,00 | 30,0   | 50,0   | 50,0   | 50,0   | 20,0   | 50,0   |
| 0,00    | 0,00    | 1,92    | 20,0   | 21,0   | 21,0   | 20,0   | 22,0   | 22,0   |
| 0,00    | 0,00    | 0,00    | 10,0   | 15,0   | 15,0   | 39,0   | 20,0   | 39,0   |
| 0,00    | 0,00    | 1,21    | 20,0   | 25,0   | 25,0   | 27,0   | 19,0   | 27,0   |
| 0,30    | 0,00    | 1,55    | 30,0   | 29,0   | 30,0   | 21,0   | 28,0   | 28,0   |
| 9999,00 | 9999,00 | 9999,00 | 50,0   | 9999,0 | 50,0   | 9999,0 | 9999,0 | 9999,0 |
| 0,00    | 0,00    | 1,14    | 40,0   | 45,0   | 45,0   | 41,0   | 50,0   | 50,0   |
| 0,30    | 0,00    | 1,97    | 50,0   | 50,0   | 50,0   | 50,0   | 50,0   | 50,0   |
| 1,00    | 0,00    | 6,18    | 18,0   | 20,0   | 20,0   | 20,0   | 20,0   | 20,0   |
| 0,80    | 0,00    | 2,61    | 50,0   | 50,0   | 50,0   | 9999,0 | 50,0   | 50,0   |
| 1,20    | 0,87    | 8,10    | 45,0   | 50,0   | 50,0   | 50,0   | 40,0   | 50,0   |
| 0,30    | 0,00    | 11,57   | 20,0   | 50,0   | 50,0   | 25,0   | 40,0   | 40,0   |
| 9999,00 | 9999,00 | 9999,00 | 50,0   | 29,0   | 50,0   | 50,0   | 32,0   | 50,0   |
| 0,10    | 4,81    | 0,00    | 50,0   | 9999,0 | 50,0   | 50,0   | 50,0   | 50,0   |
| 1,00    | 0,00    | 1,78    | 30,0   | 22,0   | 30,0   | 30,0   | 42,0   | 42,0   |
| 9999,00 | 9999,00 | 9999,00 | 50,0   | 50,0   | 50,0   | 9999,0 | 9999,0 | 9999,0 |
| 9999,00 | 9999,00 | 9999,00 | 16,0   | 15,0   | 16,0   | 25,0   | 30,0   | 30,0   |
| 0,10    | 16,53   | 0,01    | 24,0   | 24,0   | 24,0   | 30,0   | 29,0   | 30,0   |

|         |         |         |        |        |        |        |        |        |
|---------|---------|---------|--------|--------|--------|--------|--------|--------|
| 1,90    | 8,69    | 0,00    | 21,0   | 19,0   | 21,0   | 24,0   | 19,0   | 24,0   |
| 2,00    | 19,13   | 6,87    | 20,0   | 12,0   | 20,0   | 25,0   | 21,0   | 25,0   |
| 0,60    | 4,35    | 0,48    | 30,0   | 30,0   | 30,0   | 50,0   | 50,0   | 50,0   |
| 0,00    | 0,00    | 1,42    | 26,0   | 35,0   | 35,0   | 21,0   | 50,0   | 50,0   |
| 0,30    | 3,15    | 0,00    | 28,0   | 24,0   | 28,0   | 50,0   | 41,0   | 50,0   |
| 0,20    | 2,76    | 2,75    | 9999,0 | 9999,0 | 9999,0 | 9999,0 | 9999,0 | 9999,0 |
| 0,00    | 0,00    | 3,87    | 15,0   | 31,0   | 31,0   | 30,0   | 30,0   | 30,0   |
| 9999,00 | 9999,00 | 9999,00 | 28,0   | 34,0   | 34,0   | 20,0   | 22,0   | 22,0   |
| 0,00    | 0,00    | 3,46    | 18,0   | 12,0   | 18,0   | 20,0   | 16,0   | 20,0   |
| 2,50    | 0,00    | 1,05    | 50,0   | 45,0   | 50,0   | 50,0   | 50,0   | 50,0   |
| 1,40    | 0,00    | 0,00    | 14,0   | 21,0   | 21,0   | 20,0   | 19,0   | 20,0   |
| 9999,00 | 9999,00 | 9999,00 | 18,0   | 31,0   | 31,0   | 22,0   | 27,0   | 27,0   |
| 1,30    | 0,00    | 18,88   | 11,0   | 18,0   | 18,0   | 20,0   | 15,0   | 20,0   |
| 3,00    | 2,76    | 0,00    | 50,0   | 50,0   | 50,0   | 50,0   | 50,0   | 50,0   |
| 0,30    | 0,00    | 5,81    | 31,0   | 44,0   | 44,0   | 40,0   | 42,0   | 42,0   |
| 2,20    | 8,18    | 0,00    | 10,0   | 9,0    | 10,0   | 10,0   | 10,0   | 10,0   |
| 1,30    | 14,78   | 0,00    | 46,0   | 48,0   | 48,0   | 50,0   | 50,0   | 50,0   |
| 1,70    | 0,00    | 0,00    | 14,0   | 23,0   | 23,0   | 32,0   | 38,0   | 38,0   |
| 0,30    | 6,09    | 0,00    | 40,0   | 50,0   | 50,0   | 40,0   | 35,0   | 40,0   |
| 1,40    | 0,08    | 4,35    | 18,0   | 19,0   | 19,0   | 17,0   | 21,0   | 21,0   |
| 1,70    | 0,00    | 0,00    | 45,0   | 37,0   | 45,0   | 50,0   | 48,0   | 50,0   |
| 9999,00 | 9999,00 | 9999,00 | 21,0   | 21,0   | 21,0   | 25,0   | 28,0   | 28,0   |
| 9999,00 | 9999,00 | 9999,00 | 30,0   | 25,0   | 30,0   | 50,0   | 24,0   | 50,0   |
| 9999,00 | 9999,00 | 9999,00 | 21,0   | 21,0   | 21,0   | 20,0   | 25,0   | 25,0   |
| 1,80    | 0,00    | 10,70   | 50,0   | 50,0   | 50,0   | 9999,0 | 9999,0 | 9999,0 |
| 1,50    | 0,00    | 5,75    | 11,0   | 10,0   | 11,0   | 18,0   | 19,0   | 19,0   |
| 2,10    | 12,23   | 0,14    | 18,0   | 11,0   | 18,0   | 28,0   | 18,0   | 28,0   |
| 2,30    | 2,87    | 2,08    | 22,0   | 24,0   | 24,0   | 32,0   | 16,0   | 32,0   |
| 0,80    | 0,00    | 0,00    | 10,0   | 7,0    | 10,0   | 25,0   | 15,0   | 25,0   |
| 1,80    | 0,00    | 7,65    | 18,0   | 18,0   | 18,0   | 21,0   | 20,0   | 21,0   |
| 0,60    | 0,00    | 4,35    | 28,0   | 18,0   | 28,0   | 38,0   | 40,0   | 40,0   |
| 0,60    | 0,00    | 0,00    | 42,0   | 50,0   | 50,0   | 50,0   | 50,0   | 50,0   |
| 0,90    | 0,00    | 0,00    | 21,0   | 31,0   | 31,0   | 28,0   | 26,0   | 28,0   |
| 0,00    | 0,00    | 0,34    | 23,0   | 22,0   | 23,0   | 25,0   | 9999,0 | 25,0   |
| 0,20    | 0,00    | 0,34    | 25,0   | 50,0   | 50,0   | 38,0   | 40,0   | 40,0   |
| 0,40    | 0,32    | 0,47    | 45,0   | 30,0   | 45,0   | 42,0   | 48,0   | 48,0   |
| 0,00    | 2,26    | 0,00    | 15,0   | 10,0   | 15,0   | 13,0   | 11,0   | 13,0   |
| 0,40    | 36,81   | 1,14    | 19,0   | 12,0   | 19,0   | 24,0   | 25,0   | 25,0   |
| 0,00    | 0,00    | 0,00    | 10,0   | 10,0   | 10,0   | 14,0   | 14,0   | 14,0   |
| 0,40    | 4,40    | 0,00    | 20,0   | 16,0   | 20,0   | 19,0   | 14,0   | 19,0   |
| 0,00    | 2,87    | 0,00    | 12,0   | 12,0   | 12,0   | 14,0   | 13,0   | 14,0   |
| 0,90    | 2,61    | 2,81    | 25,0   | 25,0   | 25,0   | 25,0   | 25,0   | 25,0   |
| 2,20    | 0,00    | 3,48    | 27,0   | 27,0   | 27,0   | 26,0   | 25,0   | 26,0   |
| 2,10    | 0,07    | 0,41    | 50,0   | 50,0   | 50,0   | 50,0   | 50,0   | 50,0   |
| 1,20    | 0,00    | 14,78   | 25,0   | 25,0   | 25,0   | 45,0   | 35,0   | 45,0   |
| 2,00    | 14,78   | 19,63   | 38,0   | 24,0   | 38,0   | 23,0   | 24,0   | 24,0   |

| VPT95BVEt | VPT95BVEz | sum  | VPT95I cat | VPT95B' DNSinstab | C DNSpijn | 0nε DNStintel | 0 DNSgevoel | Score | DNSo |
|-----------|-----------|------|------------|-------------------|-----------|---------------|-------------|-------|------|
| 0         | 0         | 0    | 0          | 0                 | 0         | 0             | 0           | 0     | 0    |
| 0         | 0         | 0    | 0          | 0                 | 0         | 0             | 0           | 0     | 0    |
| 0         | 0         | 0    | 0          | 0                 | 0         | 0             | 0           | 0     | 0    |
| 9999      | 9999      | 9999 | 9999       | 0                 | 0         | 0             | 0           | 0     | 0    |
| 0         | 0         | 0    | 0          | 0                 | 0         | 0             | 0           | 0     | 0    |
| 0         | 0         | 0    | 0          | 0                 | 0         | 0             | 0           | 0     | 0    |
| 0         | 0         | 0    | 0          | 0                 | 0         | 0             | 0           | 0     | 0    |
| 0         | 0         | 0    | 0          | 0                 | 0         | 0             | 0           | 0     | 0    |
| 0         | 0         | 0    | 0          | 9999              | 9999      | 9999          | 9999        | 9999  | 9999 |
| 0         | 0         | 0    | 0          | 0                 | 0         | 0             | 0           | 0     | 0    |
| 0         | 0         | 0    | 0          | 0                 | 0         | 0             | 0           | 0     | 0    |
| 0         | 0         | 0    | 0          | 0                 | 0         | 0             | 0           | 0     | 0    |
| 0         | 0         | 0    | 0          | 0                 | 0         | 0             | 0           | 0     | 0    |
| 0         | 0         | 0    | 0          | 0                 | 0         | 0             | 0           | 0     | 0    |
| 0         | 0         | 0    | 0          | 0                 | 0         | 0             | 0           | 0     | 0    |
| 0         | 0         | 0    | 0          | 0                 | 0         | 0             | 0           | 0     | 0    |
| 0         | 0         | 0    | 0          | 0                 | 0         | 0             | 0           | 0     | 0    |
| 0         | 0         | 0    | 0          | 0                 | 0         | 0             | 0           | 0     | 0    |
| 0         | 0         | 0    | 0          | 0                 | 0         | 0             | 0           | 0     | 0    |
| 0         | 0         | 0    | 0          | 9999              | 9999      | 9999          | 9999        | 9999  | 9999 |
| 0         | 0         | 0    | 0          | 9999              | 9999      | 9999          | 9999        | 9999  | 9999 |
| 0         | 0         | 0    | 0          | 0                 | 0         | 0             | 0           | 0     | 0    |
| 0         | 0         | 0    | 0          | 0                 | 0         | 0             | 0           | 0     | 0    |
| 0         | 0         | 0    | 0          | 9999              | 9999      | 9999          | 9999        | 9999  | 9999 |
| 0         | 0         | 0    | 0          | 0                 | 0         | 0             | 0           | 0     | 0    |
| 0         | 0         | 0    | 0          | 9999              | 9999      | 9999          | 9999        | 9999  | 9999 |
| 0         | 0         | 0    | 0          | 0                 | 0         | 0             | 0           | 0     | 0    |
| 0         | 0         | 0    | 0          | 9999              | 9999      | 9999          | 9999        | 9999  | 9999 |
| 0         | 0         | 0    | 0          | 0                 | 0         | 0             | 0           | 0     | 0    |
| 0         | 0         | 0    | 0          | 9999              | 9999      | 9999          | 9999        | 9999  | 9999 |
| 0         | 0         | 0    | 0          | 0                 | 0         | 0             | 0           | 0     | 0    |
| 0         | 0         | 0    | 0          | 9999              | 9999      | 9999          | 9999        | 9999  | 9999 |
| 0         | 0         | 0    | 0          | 0                 | 0         | 0             | 0           | 0     | 0    |
| 0         | 0         | 0    | 0          | 9999              | 9999      | 9999          | 9999        | 9999  | 9999 |
| 1         | 0         | 1    | 1          | 1                 | 1         | 1             | 1           | 1     | 4    |
| 0         | 1         | 1    | 1          | 0                 | 0         | 0             | 0           | 0     | 0    |
| 0         | 0         | 0    | 0          | 1                 | 0         | 1             | 0           | 2     | 2    |
| 1         | 1         | 2    | 1          | 0                 | 0         | 0             | 0           | 0     | 0    |
| 0         | 0         | 0    | 0          | 1                 | 1         | 1             | 0           | 3     | 3    |
| 1         | 1         | 2    | 1          | 0                 | 0         | 0             | 0           | 0     | 0    |
| 9999      | 9999      | 9999 | 9999       | 1                 | 1         | 1             | 1           | 4     | 4    |
| 1         | 1         | 2    | 1          | 9999              | 9999      | 9999          | 9999        | 9999  | 9999 |
| 0         | 0         | 0    | 0          | 1                 | 0         | 0             | 0           | 1     | 1    |
| 1         | 0         | 1    | 1          | 9999              | 9999      | 9999          | 9999        | 9999  | 9999 |
| 1         | 1         | 2    | 1          | 0                 | 0         | 0             | 0           | 0     | 0    |
| 0         | 1         | 1    | 1          | 1                 | 1         | 1             | 1           | 4     | 4    |
| 1         | 0         | 1    | 1          | 0                 | 0         | 0             | 0           | 0     | 0    |
| 1         | 1         | 2    | 1          | 9999              | 9999      | 9999          | 9999        | 9999  | 9999 |



|      |      |      |      |      |      |      |      |      |
|------|------|------|------|------|------|------|------|------|
| 0    | 0    | 0    | 0    | 0    | 0    | 0    | 0    | 0    |
| 0    | 0    | 0    | 0    | 0    | 1    | 1    | 0    | 2    |
| 0    | 1    | 1    | 1    | 0    | 0    | 0    | 0    | 0    |
| 0    | 1    | 1    | 1    | 1    | 1    | 1    | 0    | 3    |
| 0    | 1    | 1    | 1    | 1    | 0    | 0    | 0    | 1    |
| 9999 | 9999 | 9999 | 9999 | 1    | 1    | 1    | 0    | 3    |
| 0    | 0    | 0    | 0    | 0    | 0    | 0    | 0    | 0    |
| 0    | 0    | 0    | 0    | 9999 | 9999 | 9999 | 9999 | 9999 |
| 0    | 0    | 0    | 0    | 0    | 0    | 0    | 0    | 0    |
| 1    | 1    | 2    | 1    | 0    | 0    | 0    | 0    | 0    |
| 0    | 0    | 0    | 0    | 1    | 1    | 1    | 0    | 3    |
| 1    | 0    | 1    | 1    | 9999 | 9999 | 9999 | 9999 | 9999 |
| 0    | 0    | 0    | 0    | 0    | 0    | 0    | 0    | 0    |
| 1    | 1    | 2    | 1    | 0    | 0    | 0    | 0    | 0    |
| 1    | 1    | 2    | 1    | 1    | 1    | 1    | 1    | 4    |
| 0    | 0    | 0    | 0    | 0    | 0    | 0    | 0    | 0    |
| 1    | 1    | 2    | 1    | 0    | 0    | 0    | 0    | 0    |
| 0    | 1    | 1    | 1    | 0    | 1    | 1    | 1    | 3    |
| 1    | 1    | 2    | 1    | 0    | 1    | 1    | 0    | 2    |
| 0    | 0    | 0    | 0    | 0    | 0    | 0    | 0    | 0    |
| 1    | 1    | 2    | 1    | 0    | 0    | 0    | 0    | 0    |
| 0    | 0    | 0    | 0    | 9999 | 9999 | 9999 | 9999 | 9999 |
| 0    | 1    | 1    | 1    | 9999 | 9999 | 9999 | 9999 | 9999 |
| 0    | 0    | 0    | 0    | 9999 | 9999 | 9999 | 9999 | 9999 |
| 1    | 9999 | 1    | 1    | 0    | 0    | 0    | 0    | 0    |
| 0    | 0    | 0    | 0    | 0    | 0    | 0    | 0    | 0    |
| 0    | 0    | 0    | 0    | 0    | 0    | 0    | 0    | 0    |
| 0    | 1    | 1    | 1    | 0    | 0    | 0    | 0    | 0    |
| 0    | 0    | 0    | 0    | 1    | 0    | 0    | 0    | 1    |
| 0    | 0    | 0    | 0    | 0    | 0    | 0    | 0    | 0    |
| 0    | 0    | 0    | 0    | 1    | 0    | 0    | 0    | 1    |
| 1    | 1    | 2    | 1    | 1    | 1    | 1    | 1    | 4    |
| 1    | 0    | 1    | 1    | 1    | 1    | 1    | 1    | 4    |
| 0    | 0    | 0    | 0    | 0    | 0    | 0    | 0    | 0    |
| 1    | 0    | 1    | 1    | 0    | 0    | 0    | 0    | 0    |
| 1    | 1    | 2    | 1    | 1    | 0    | 0    | 0    | 1    |
| 0    | 0    | 0    | 0    | 1    | 0    | 1    | 0    | 2    |
| 0    | 0    | 0    | 0    | 0    | 0    | 0    | 0    | 0    |
| 0    | 0    | 0    | 0    | 0    | 0    | 0    | 0    | 0    |
| 0    | 0    | 0    | 0    | 0    | 0    | 0    | 0    | 0    |
| 0    | 0    | 0    | 0    | 0    | 0    | 0    | 0    | 0    |
| 0    | 0    | 0    | 0    | 0    | 0    | 0    | 0    | 0    |
| 1    | 0    | 1    | 1    | 0    | 0    | 0    | 0    | 0    |
| 1    | 0    | 1    | 1    | 1    | 0    | 0    | 0    | 1    |
| 1    | 1    | 2    | 1    | 0    | 0    | 0    | 0    | 0    |
| 0    | 0    | 0    | 0    | 0    | 0    | 0    | 0    | 0    |
| 1    | 0    | 1    | 1    | 0    | 0    | 0    | 0    | 0    |

| catDNS | NPDNSVPT | HKK1kg | HKK2kg | HKK3kg | SPPB2m44: | SPPBtande | SPPBsmals: | SPPBsemita: |
|--------|----------|--------|--------|--------|-----------|-----------|------------|-------------|
| 0      | 0        | 17     | 14     | 12     | 3,00      | 2,00      | 2,00       | 2,00        |
| 0      | 0        | 20     | 20     | 18     | 3,00      | 2,00      | 2,00       | 2,00        |
| 0      | 0        | 10     | 10     | 12     | 2,00      | 2,00      | 2,00       | 2,00        |
| 0      | 0        | 6      | 5      | 6      | 1,00      | 1,00      | 2,00       | 2,00        |
| 0      | 0        | 22     | 26     | 26     | 4,00      | 2,00      | 2,00       | 2,00        |
| 0      | 0        | 10     | 11     | 12     | 4,00      | 1,00      | 2,00       | 2,00        |
| 0      | 0        | 9999   | 9999   | 9999   | 3,00      | 1,00      | 2,00       | 2,00        |
| 0      | 0        | 10     | 8      | 7      | 9999,00   | 9999,00   | 9999,00    | 9999,00     |
| 9999   | 0        | 9999   | 9999   | 9999   | 2,00      | 2,00      | 2,00       | 2,00        |
| 0      | 0        | 33     | 39     | 33     | 4,00      | 2,00      | 2,00       | 2,00        |
| 0      | 0        | 19     | 22     | 22     | 4,00      | 2,00      | 2,00       | 2,00        |
| 0      | 0        | 34     | 39     | 40     | 4,00      | 2,00      | 2,00       | 2,00        |
| 0      | 0        | 19     | 17     | 19     | 4,00      | 2,00      | 2,00       | 2,00        |
| 0      | 0        | 27     | 26     | 28     | 4,00      | 2,00      | 2,00       | 2,00        |
| 0      | 0        | 14     | 15     | 16     | 4,00      | 2,00      | 2,00       | 2,00        |
| 0      | 0        | 45     | 45     | 44     | 4,00      | 2,00      | 2,00       | 2,00        |
| 0      | 0        | 46     | 51     | 54     | 4,00      | 2,00      | 2,00       | 2,00        |
| 0      | 0        | 40     | 39     | 42     | 4,00      | 2,00      | 2,00       | 2,00        |
| 9999   | 0        | 13     | 14     | 11     | 4,00      | 2,00      | 2,00       | 2,00        |
| 9999   | 0        | 40     | 40     | 37     | 4,00      | 2,00      | 2,00       | 2,00        |
| 0      | 0        | 40     | 42     | 41     | 4,00      | 2,00      | 2,00       | 2,00        |
| 0      | 0        | 26     | 25     | 30     | 4,00      | 2,00      | 2,00       | 2,00        |
| 9999   | 0        | 36     | 42     | 45     | 4,00      | 2,00      | 2,00       | 2,00        |
| 0      | 0        | 42     | 47     | 46     | 4,00      | 2,00      | 2,00       | 2,00        |
| 9999   | 0        | 18     | 18     | 16     | 4,00      | 2,00      | 2,00       | 2,00        |
| 0      | 0        | 22     | 22     | 22     | 4,00      | 2,00      | 2,00       | 2,00        |
| 0      | 0        | 24     | 24     | 26     | 4,00      | 2,00      | 2,00       | 2,00        |
| 0      | 0        | 38     | 34     | 32     | 4,00      | 2,00      | 2,00       | 2,00        |
| 9999   | 0        | 20     | 20     | 18     | 4,00      | 2,00      | 2,00       | 2,00        |
| 0      | 0        | 20     | 16     | 16     | 4,00      | 2,00      | 2,00       | 2,00        |
| 9999   | 0        | 24     | 24     | 24     | 4,00      | 2,00      | 2,00       | 2,00        |
| 9999   | 0        | 24     | 28     | 30     | 4,00      | 2,00      | 2,00       | 2,00        |
| 0      | 0        | 20     | 16     | 16     | 4,00      | 2,00      | 2,00       | 2,00        |
| 0      | 0        | 24     | 24     | 26     | 4,00      | 2,00      | 2,00       | 2,00        |
| 9999   | 0        | 19     | 18     | 18     | 4,00      | 2,00      | 2,00       | 2,00        |
| 1      | 2        | 22     | 22     | 19     | 3,00      | 0,00      | 2,00       | 2,00        |
| 0      | 1        | 20     | 20     | 21     | 4,00      | 2,00      | 2,00       | 2,00        |
| 1      | 1        | 20     | 20     | 22     | 3,00      | 0,00      | 2,00       | 2,00        |
| 0      | 1        | 14     | 14     | 14     | 2,00      | 2,00      | 2,00       | 2,00        |
| 1      | 1        | 10     | 11     | 10     | 1,00      | 0,00      | 2,00       | 2,00        |
| 0      | 1        | 9999   | 8      | 5      | 1,00      | 1,00      | 2,00       | 2,00        |
| 1      | 1        | 35     | 39     | 36     | 3,00      | 0,00      | 1,00       | 0,00        |
| 9999   | 1        | 14     | 9      | 14     | 4,00      | 2,00      | 2,00       | 2,00        |
| 1      | 1        | 24     | 22     | 22     | 3,00      | 2,00      | 2,00       | 2,00        |
| 9999   | 1        | 10     | 10     | 10     | 3,00      | 0,00      | 2,00       | 2,00        |
| 0      | 1        | 16     | 16     | 14     | 3,00      | 2,00      | 2,00       | 2,00        |
| 1      | 2        | 5      | 9999   | 9999   | 2,00      | 2,00      | 2,00       | 2,00        |
| 0      | 1        | 9      | 14     | 15     | 4,00      | 2,00      | 2,00       | 2,00        |
| 9999   | 1        | 6      | 7      | 6      | 2,00      | 9999,00   | 2,00       | 9999,00     |



|      |   |      |      |      |         |         |      |      |
|------|---|------|------|------|---------|---------|------|------|
| 9999 | 0 | 15   | 12   | 16   | 2,00    | 0,00    | 1,00 | 0,00 |
| 1    | 2 | 20   | 20   | 23   | 4,00    | 1,00    | 2,00 | 2,00 |
| 1    | 2 | 19   | 22   | 21   | 4,00    | 2,00    | 2,00 | 2,00 |
| 0    | 0 | 16   | 12   | 14   | 2,00    | 2,00    | 2,00 | 2,00 |
| 1    | 1 | 12   | 9    | 8    | 9999,00 | 0,00    | 0,00 | 0,00 |
| 1    | 2 | 26   | 30   | 30   | 4,00    | 2,00    | 2,00 | 2,00 |
| 1    | 1 | 9999 | 9999 | 9999 | 2,00    | 0,00    | 2,00 | 0,00 |
| 1    | 2 | 10   | 9999 | 9999 | 1,00    | 0,00    | 0,00 | 0,00 |
| 1    | 1 | 9999 | 9999 | 9999 | 1,00    | 1,00    | 2,00 | 2,00 |
| 9999 | 1 | 9999 | 9999 | 8    | 1,00    | 0,00    | 0,00 | 0,00 |
| 0    | 0 | 20   | 22   | 24   | 2,00    | 2,00    | 2,00 | 2,00 |
| 1    | 2 | 8    | 10   | 8    | 2,00    | 2,00    | 2,00 | 2,00 |
| 1    | 2 | 10   | 12   | 12   | 2,00    | 0,00    | 0,00 | 0,00 |
| 0    | 1 | 6    | 6    | 8    | 1,00    | 0,00    | 2,00 | 2,00 |
| 1    | 1 | 6    | 6    | 8    | 1,00    | 0,00    | 2,00 | 2,00 |
| 0    | 1 | 9999 | 9999 | 9999 | 1,00    | 1,00    | 2,00 | 2,00 |
| 1    | 1 | 28   | 27   | 27   | 3,00    | 9999,00 | 2,00 | 2,00 |
| 0    | 0 | 24   | 25   | 21   | 3,00    | 0,00    | 2,00 | 2,00 |
| 1    | 1 | 18   | 18   | 15   | 3,00    | 1,00    | 2,00 | 2,00 |
| 1    | 1 | 16   | 16   | 16   | 1,00    | 0,00    | 2,00 | 0,00 |
| 1    | 1 | 9999 | 9999 | 9999 | 3,00    | 9999,00 | 2,00 | 2,00 |
| 1    | 1 | 13   | 13   | 15   | 3,00    | 9999,00 | 2,00 | 2,00 |
| 0    | 0 | 9999 | 5    | 5    | 1,00    | 9999,00 | 2,00 | 2,00 |
| 1    | 2 | 10   | 11   | 10   | 2,00    | 1,00    | 2,00 | 2,00 |
| 0    | 1 | 16   | 18   | 16   | 1,00    | 0,00    | 2,00 | 2,00 |
| 1    | 1 | 9999 | 6    | 6    | 1,00    | 0,00    | 2,00 | 2,00 |
| 0    | 1 | 10   | 8    | 8    | 1,00    | 9999,00 | 2,00 | 2,00 |
| 1    | 1 | 9999 | 9999 | 9999 | 1,00    | 1,00    | 2,00 | 2,00 |
| 0    | 1 | 16   | 18   | 18   | 2,00    | 2,00    | 2,00 | 2,00 |
| 9999 | 0 | 9999 | 9999 | 9999 | 1,00    | 0,00    | 2,00 | 2,00 |
| 1    | 2 | 10   | 10   | 10   | 3,00    | 0,00    | 2,00 | 0,00 |
| 0    | 1 | 18   | 20   | 18   | 2,00    | 0,00    | 2,00 | 2,00 |
| 9999 | 1 | 9999 | 8    | 8    | 1,00    | 1,00    | 2,00 | 2,00 |
| 0    | 0 | 9999 | 9999 | 9999 | 1,00    | 0,00    | 0,00 | 0,00 |
| 1    | 1 | 18   | 17   | 16   | 2,00    | 1,00    | 2,00 | 2,00 |
| 1    | 1 | 8    | 7    | 9999 | 2,00    | 2,00    | 2,00 | 2,00 |
| 1    | 1 | 9999 | 9999 | 9999 | 3,00    | 1,00    | 2,00 | 2,00 |
| 9999 | 1 | 14   | 18   | 16   | 3,00    | 0,00    | 0,00 | 0,00 |
| 1    | 2 | 19   | 22   | 21   | 3,00    | 2,00    | 2,00 | 2,00 |
| 1    | 2 | 12   | 10   | 10   | 1,00    | 1,00    | 2,00 | 2,00 |
| 0    | 0 | 20   | 21   | 25   | 4,00    | 9999,00 | 2,00 | 2,00 |
| 0    | 1 | 16   | 17   | 19   | 2,00    | 1,00    | 2,00 | 2,00 |
| 0    | 1 | 36   | 36   | 36   | 3,00    | 2,00    | 2,00 | 2,00 |
| 0    | 1 | 34   | 35   | 35   | 3,00    | 1,00    | 2,00 | 2,00 |
| 9999 | 1 | 25   | 28   | 27   | 4,00    | 1,00    | 2,00 | 2,00 |
| 1    | 2 | 5    | 6    | 5    | 1,00    | 9999,00 | 2,00 | 2,00 |
| 1    | 2 | 5    | 9999 | 9999 | 3,00    | 0,00    | 2,00 | 0,00 |
| 9999 | 1 | 6    | 5    | 6    | 1,00    | 9999,00 | 2,00 | 2,00 |
| 9999 | 0 | 23   | 23   | 22   | 2,00    | 1,00    | 2,00 | 2,00 |
| 0    | 0 | 6    | 7    | 6    | 4,00    | 1,00    | 2,00 | 2,00 |

|      |   |      |      |    |         |         |      |      |
|------|---|------|------|----|---------|---------|------|------|
| 0    | 0 | 38   | 35   | 36 | 4,00    | 2,00    | 2,00 | 2,00 |
| 1    | 1 | 16   | 16   | 18 | 4,00    | 2,00    | 2,00 | 2,00 |
| 0    | 1 | 10   | 10   | 11 | 2,00    | 2,00    | 2,00 | 2,00 |
| 1    | 2 | 10   | 15   | 11 | 9999,00 | 0,00    | 0,00 | 0,00 |
| 1    | 2 | 16   | 16   | 16 | 3,00    | 1,00    | 2,00 | 2,00 |
| 1    | 1 | 8    | 6    | 7  | 2,00    | 9999,00 | 2,00 | 2,00 |
| 0    | 0 | 16   | 17   | 17 | 2,00    | 0,00    | 2,00 | 2,00 |
| 9999 | 0 | 8    | 6    | 7  | 1,00    | 2,00    | 2,00 | 2,00 |
| 0    | 0 | 9999 | 9999 | 5  | 1,00    | 0,00    | 1,00 | 1,00 |
| 0    | 1 | 18   | 18   | 20 | 4,00    | 1,00    | 2,00 | 2,00 |
| 1    | 1 | 20   | 19   | 16 | 4,00    | 2,00    | 2,00 | 2,00 |
| 9999 | 1 | 11   | 14   | 18 | 4,00    | 2,00    | 2,00 | 2,00 |
| 0    | 0 | 28   | 29   | 34 | 4,00    | 2,00    | 2,00 | 2,00 |
| 0    | 1 | 26   | 26   | 31 | 4,00    | 2,00    | 2,00 | 2,00 |
| 1    | 2 | 24   | 21   | 23 | 4,00    | 2,00    | 2,00 | 2,00 |
| 0    | 0 | 18   | 17   | 16 | 4,00    | 2,00    | 2,00 | 2,00 |
| 0    | 1 | 24   | 24   | 24 | 4,00    | 1,00    | 2,00 | 2,00 |
| 1    | 2 | 8    | 10   | 10 | 3,00    | 2,00    | 2,00 | 2,00 |
| 1    | 2 | 9    | 10   | 11 | 2,00    | 2,00    | 2,00 | 2,00 |
| 0    | 0 | 17   | 20   | 19 | 3,00    | 2,00    | 2,00 | 2,00 |
| 0    | 1 | 16   | 16   | 18 | 3,00    | 2,00    | 2,00 | 2,00 |
| 9999 | 0 | 23   | 20   | 22 | 4,00    | 2,00    | 2,00 | 2,00 |
| 9999 | 1 | 11   | 14   | 14 | 4,00    | 1,00    | 2,00 | 2,00 |
| 9999 | 0 | 7    | 9    | 8  | 1,00    | 1,00    | 2,00 | 2,00 |
| 0    | 1 | 13   | 13   | 10 | 4,00    | 2,00    | 2,00 | 2,00 |
| 0    | 0 | 16   | 14   | 18 | 4,00    | 2,00    | 2,00 | 2,00 |
| 0    | 0 | 38   | 39   | 42 | 4,00    | 2,00    | 2,00 | 2,00 |
| 0    | 1 | 24   | 23   | 20 | 4,00    | 1,00    | 2,00 | 2,00 |
| 1    | 1 | 14   | 10   | 14 | 4,00    | 1,00    | 2,00 | 1,00 |
| 0    | 0 | 22   | 21   | 25 | 9999,00 | 2,00    | 2,00 | 2,00 |
| 1    | 1 | 28   | 28   | 30 | 3,00    | 2,00    | 2,00 | 2,00 |
| 1    | 2 | 10   | 14   | 12 | 1,00    | 2,00    | 2,00 | 2,00 |
| 1    | 2 | 20   | 18   | 20 | 4,00    | 1,00    | 2,00 | 2,00 |
| 0    | 0 | 17   | 18   | 16 | 2,00    | 1,00    | 2,00 | 2,00 |
| 0    | 1 | 15   | 16   | 16 | 1,00    | 0,00    | 2,00 | 1,00 |
| 1    | 2 | 10   | 12   | 12 | 9999,00 | 0,00    | 2,00 | 2,00 |
| 1    | 1 | 10   | 12   | 13 | 1,00    | 0,00    | 2,00 | 2,00 |
| 0    | 0 | 26   | 24   | 24 | 2,00    | 2,00    | 2,00 | 2,00 |
| 0    | 0 | 12   | 12   | 12 | 1,00    | 1,00    | 2,00 | 2,00 |
| 0    | 0 | 8    | 8    | 8  | 1,00    | 1,00    | 2,00 | 2,00 |
| 0    | 0 | 24   | 22   | 25 | 2,00    | 1,00    | 2,00 | 2,00 |
| 0    | 1 | 34   | 36   | 33 | 4,00    | 2,00    | 2,00 | 2,00 |
| 1    | 2 | 48   | 48   | 48 | 4,00    | 2,00    | 2,00 | 2,00 |
| 0    | 1 | 26   | 25   | 25 | 4,00    | 2,00    | 2,00 | 2,00 |
| 0    | 0 | 36   | 36   | 36 | 4,00    | 2,00    | 2,00 | 2,00 |
| 0    | 1 | 48   | 48   | 50 | 4,00    | 2,00    | 2,00 | 2,00 |

| SPPBalanc | SPPBTRsc | somSPPBsc | MPExp1  | MPExp2  | MPExp3  | MPInsp1 | MPInsp2 | MPInsp3 |
|-----------|----------|-----------|---------|---------|---------|---------|---------|---------|
| 4,00      | 0,00     | 7,00      | 40,87   | 54,95   | 9999,00 | 21,33   | 31,67   | 9999,00 |
| 4,00      | 3,00     | 10,00     | 84,18   | 85,16   | 9999,00 | 45,57   | 58,52   | 9999,00 |
| 4,00      | 0,00     | 6,00      | 45,39   | 80,40   | 69,39   | 29,59   | 41,76   | 36,42   |
| 3,00      | 0,00     | 4,00      | 30,00   | 21,45   | 33,30   | 14,14   | 15,19   | 20,02   |
| 4,00      | 0,00     | 8,00      | 115,26  | 127,55  | 113,41  | 50,08   | 55,57   | 40,24   |
| 3,00      | 1,00     | 8,00      | 62,00   | 72,57   | 52,61   | 23,85   | 31,92   | 26,95   |
| 3,00      | 0,00     | 6,00      | 50,25   | 38,22   | 29,33   | 18,64   | 7,49    | 9999,00 |
| 9999,00   | 9999,00  | 9999,00   | 94,28   | 75,54   | 61,77   | 16,48   | 14,94   | 14,24   |
| 4,00      | 0,00     | 6,00      | 9999,00 | 9999,00 | 9999,00 | 9999,00 | 9999,00 | 9999,00 |
| 4,00      | 4,00     | 12,00     | 94,75   | 133,30  | 115,45  | 64,87   | 82,10   | 96,51   |
| 4,00      | 2,00     | 10,00     | 54,42   | 58,56   | 70,34   | 20,24   | 37,22   | 26,05   |
| 4,00      | 4,00     | 12,00     | 93,31   | 118,59  | 89,40   | 47,90   | 33,21   | 55,52   |
| 4,00      | 1,00     | 9,00      | 9999,00 | 9999,00 | 9999,00 | 9999,00 | 9999,00 | 9999,00 |
| 4,00      | 3,00     | 11,00     | 87,88   | 98,37   | 105,69  | 60,75   | 78,97   | 70,93   |
| 4,00      | 3,00     | 11,00     | 75,60   | 74,02   | 71,48   | 73,48   | 82,66   | 72,96   |
| 4,00      | 4,00     | 12,00     | 171,00  | 143,00  | 146,00  | 103,77  | 111,24  | 113,35  |
| 4,00      | 3,00     | 11,00     | 124,89  | 108,54  | 115,69  | 116,72  | 124,35  | 129,51  |
| 4,00      | 3,00     | 11,00     | 96,27   | 89,75   | 77,07   | 39,77   | 9999,00 | 9999,00 |
| 4,00      | 2,00     | 10,00     | 94,97   | 115,36  | 123,40  | 50,45   | 68,42   | 66,41   |
| 4,00      | 4,00     | 12,00     | 111,34  | 108,42  | 9999,00 | 69,50   | 62,60   | 9999,00 |
| 4,00      | 4,00     | 12,00     | 112,33  | 114,04  | 113,72  | 78,40   | 88,76   | 82,51   |
| 4,00      | 4,00     | 12,00     | 90,68   | 119,65  | 107,37  | 99,13   | 120,76  | 118,32  |
| 4,00      | 3,00     | 11,00     | 9999,00 | 9999,00 | 9999,00 | 9999,00 | 9999,00 | 9999,00 |
| 4,00      | 4,00     | 12,00     | 96,52   | 90,79   | 92,78   | 52,06   | 67,96   | 59,39   |
| 4,00      | 1,00     | 9,00      | 55,41   | 63,97   | 60,68   | 45,24   | 49,77   | 47,80   |
| 4,00      | 4,00     | 12,00     | 97,01   | 95,87   | 93,07   | 57,64   | 50,86   | 55,25   |
| 4,00      | 2,00     | 10,00     | 86,42   | 90,81   | 97,03   | 49,71   | 46,03   | 45,38   |
| 4,00      | 4,00     | 12,00     | 92,77   | 97,52   | 99,40   | 61,32   | 49,68   | 54,20   |
| 4,00      | 1,00     | 9,00      | 87,16   | 90,39   | 73,15   | 34,09   | 37,73   | 35,21   |
| 4,00      | 3,00     | 11,00     | 97,23   | 122,44  | 9999,00 | 87,85   | 91,24   | 9999,00 |
| 4,00      | 4,00     | 12,00     | 89,47   | 85,87   | 80,51   | 58,78   | 72,09   | 70,96   |
| 4,00      | 3,00     | 11,00     | 154,97  | 136,68  | 9999,00 | 73,51   | 68,69   | 9999,00 |
| 4,00      | 4,00     | 12,00     | 130,91  | 120,30  | 114,59  | 89,92   | 9999,00 | 9999,00 |
| 4,00      | 4,00     | 12,00     | 110,37  | 106,00  | 98,85   | 72,44   | 69,21   | 66,32   |
| 4,00      | 3,00     | 11,00     | 101,28  | 103,31  | 9999,00 | 78,12   | 84,80   | 9999,00 |
| 2,00      | 1,00     | 6,00      | 9999,00 | 9999,00 | 9999,00 | 9999,00 | 9999,00 | 9999,00 |
| 4,00      | 1,00     | 9,00      | 64,12   | 78,19   | 83,64   | 56,54   | 58,47   | 33,29   |
| 2,00      | 1,00     | 6,00      | 9999,00 | 9999,00 | 9999,00 | 9999,00 | 9999,00 | 9999,00 |
| 4,00      | 0,00     | 6,00      | 67,89   | 65,72   | 73,01   | 27,19   | 26,29   | 24,39   |
| 2,00      | 0,00     | 3,00      | 55,97   | 55,45   | 46,85   | 26,29   | 26,50   | 11,94   |
| 3,00      | 0,00     | 4,00      | 41,06   | 49,53   | 38,10   | 41,74   | 32,61   | 34,12   |
| 0,00      | 0,00     | 3,00      | 98,50   | 117,25  | 111,34  | 56,30   | 75,49   | 55,85   |
| 4,00      | 2,00     | 10,00     | 91,23   | 89,63   | 101,79  | 65,30   | 60,03   | 87,18   |
| 4,00      | 0,00     | 7,00      | 91,63   | 92,08   | 98,02   | 31,94   | 36,85   | 34,97   |
| 2,00      | 0,00     | 5,00      | 23,74   | 26,56   | 13,10   | 11,81   | 7,52    | 16,84   |
| 4,00      | 0,00     | 7,00      | 61,11   | 64,38   | 57,77   | 39,30   | 35,38   | 29,99   |
| 4,00      | 0,00     | 6,00      | 79,05   | 90,02   | 97,21   | 48,85   | 47,95   | 28,90   |
| 4,00      | 1,00     | 9,00      | 67,07   | 79,26   | 81,27   | 14,13   | 16,08   | 16,42   |
| 9999,00   | 9999,00  | 9999,00   | 42,74   | 46,42   | 43,69   | 20,54   | 19,43   | 17,33   |

|         |      |         |         |         |         |         |         |         |
|---------|------|---------|---------|---------|---------|---------|---------|---------|
| 0,00    | 0,00 | 2,00    | 42,74   | 46,42   | 43,69   | 20,54   | 19,43   | 17,33   |
| 2,00    | 1,00 | 7,00    | 112,41  | 106,16  | 116,74  | 44,73   | 66,79   | 87,57   |
| 4,00    | 2,00 | 10,00   | 9999,00 | 9999,00 | 9999,00 | 9999,00 | 9999,00 | 9999,00 |
| 4,00    | 1,00 | 7,00    | 39,10   | 49,86   | 44,24   | 38,31   | 38,66   | 37,00   |
| 0,00    | 0,00 | 9999,00 | 41,21   | 28,92   | 37,36   | 22,74   | 27,08   | 28,87   |
| 4,00    | 1,00 | 9,00    | 9999,00 | 9999,00 | 9999,00 | 9999,00 | 9999,00 | 9999,00 |
| 0,00    | 0,00 | 2,00    | 9999,00 | 9999,00 | 9999,00 | 9999,00 | 9999,00 | 9999,00 |
| 0,00    | 0,00 | 1,00    | 11,38   | 29,01   | 12,83   | 9,66    | 3,41    | 9999,00 |
| 3,00    | 0,00 | 4,00    | 33,34   | 38,26   | 30,87   | 22,87   | 11,21   | 16,29   |
| 0,00    | 0,00 | 1,00    | 9999,00 | 9999,00 | 9999,00 | 9999,00 | 9999,00 | 9999,00 |
| 4,00    | 1,00 | 7,00    | 38,63   | 36,65   | 27,13   | 16,39   | 19,76   | 9,32    |
| 4,00    | 0,00 | 6,00    | 73,35   | 36,87   | 66,03   | 14,18   | 6,78    | 9999,00 |
| 0,00    | 0,00 | 2,00    | 57,46   | 50,14   | 55,97   | 44,98   | 35,94   | 33,85   |
| 2,00    | 0,00 | 3,00    | 53,21   | 56,79   | 78,35   | 8,45    | 16,42   | 16,51   |
| 2,00    | 0,00 | 3,00    | 32,31   | 42,79   | 48,18   | 32,64   | 41,83   | 28,71   |
| 3,00    | 0,00 | 4,00    | 36,44   | 25,39   | 29,92   | 9,24    | 18,69   | 23,28   |
| 9999,00 | 0,00 | 9999,00 | 52,43   | 58,42   | 57,64   | 24,97   | 27,08   | 28,74   |
| 2,00    | 0,00 | 5,00    | 97,53   | 110,31  | 103,29  | 37,88   | 42,33   | 35,88   |
| 3,00    | 0,00 | 6,00    | 78,05   | 77,58   | 77,37   | 20,50   | 32,99   | 29,03   |
| 1,00    | 0,00 | 2,00    | 46,83   | 49,57   | 44,58   | 11,96   | 15,07   | 14,24   |
| 9999,00 | 0,00 | 9999,00 | 31,68   | 31,34   | 33,15   | 7,19    | 6,53    | 6,50    |
| 9999,00 | 0,00 | 9999,00 | 30,68   | 32,45   | 35,21   | 44,55   | 44,96   | 37,28   |
| 9999,00 | 0,00 | 9999,00 | 43,50   | 47,90   | 9999,00 | 8,12    | 9999,00 | 9999,00 |
| 3,00    | 2,00 | 7,00    | 41,48   | 92,50   | 9999,00 | 31,97   | 31,58   | 9999,00 |
| 2,00    | 0,00 | 3,00    | 68,41   | 51,34   | 63,51   | 32,11   | 19,98   | 29,82   |
| 2,00    | 0,00 | 3,00    | 49,70   | 30,34   | 9999,00 | 12,65   | 2,71    | 9999,00 |
| 9999,00 | 0,00 | 9999,00 | 35,34   | 22,48   | 9999,00 | 22,29   | 12,20   | 9999,00 |
| 2,00    | 0,00 | 3,00    | 31,98   | 22,62   | 9999,00 | 9,59    | 11,62   | 9999,00 |
| 4,00    | 0,00 | 6,00    | 55,12   | 36,26   | 41,75   | 57,24   | 31,77   | 23,26   |
| 2,00    | 0,00 | 3,00    | 44,86   | 38,05   | 38,25   | 22,60   | 26,61   | 20,78   |
| 1,00    | 0,00 | 4,00    | 35,38   | 33,69   | 32,61   | 8,37    | 7,01    | 11,99   |
| 2,00    | 0,00 | 4,00    | 52,23   | 47,33   | 48,80   | 8,28    | 21,19   | 12,10   |
| 2,00    | 0,00 | 3,00    | 75,42   | 61,31   | 65,45   | 14,61   | 7,09    | 25,09   |
| 0,00    | 0,00 | 1,00    | 30,34   | 23,78   | 10,39   | 2,71    | 8,55    | 11,19   |
| 2,00    | 0,00 | 4,00    | 65,51   | 78,20   | 91,58   | 67,11   | 76,96   | 73,57   |
| 4,00    | 0,00 | 6,00    | 65,45   | 53,54   | 62,97   | 25,09   | 16,51   | 25,95   |
| 2,00    | 0,00 | 5,00    | 103,50  | 99,81   | 9999,00 | 51,70   | 55,72   | 9999,00 |
| 0,00    | 0,00 | 3,00    | 73,14   | 79,55   | 59,32   | 13,07   | 15,28   | 15,22   |
| 4,00    | 1,00 | 8,00    | 80,12   | 82,71   | 84,17   | 39,34   | 35,00   | 83,00   |
| 3,00    | 3,00 | 7,00    | 78,99   | 98,47   | 95,33   | 43,87   | 42,99   | 23,24   |
| 9999,00 | 0,00 | 9999,00 | 9999,00 | 9999,00 | 9999,00 | 9999,00 | 9999,00 | 9999,00 |
| 3,00    | 1,00 | 6,00    | 110,94  | 105,95  | 101,70  | 64,34   | 86,90   | 79,73   |
| 4,00    | 4,00 | 11,00   | 99,37   | 98,22   | 9999,00 | 73,03   | 52,94   | 9999,00 |
| 3,00    | 4,00 | 10,00   | 100,60  | 103,89  | 101,49  | 43,79   | 50,55   | 53,00   |
| 4,00    | 1,00 | 9,00    | 85,34   | 96,09   | 101,25  | 41,18   | 53,17   | 54,24   |
| 9999,00 | 0,00 | 9999,00 | 63,13   | 51,26   | 61,07   | 15,64   | 23,29   | 16,24   |
| 1,00    | 0,00 | 4,00    | 34,14   | 23,01   | 27,96   | 15,44   | 17,20   | 17,53   |
| 9999,00 | 0,00 | 9999,00 | 36,35   | 39,09   | 42,03   | 15,26   | 9,02    | 15,07   |
| 3,00    | 0,00 | 5,00    | 93,56   | 96,80   | 97,51   | 48,89   | 47,85   | 36,22   |
| 2,00    | 0,00 | 6,00    | 62,15   | 66,31   | 59,47   | 21,54   | 30,48   | 25,97   |

|         |         |         |         |         |         |         |         |         |
|---------|---------|---------|---------|---------|---------|---------|---------|---------|
| 4,00    | 3,00    | 11,00   | 131,30  | 131,19  | 129,44  | 105,64  | 112,13  | 105,60  |
| 4,00    | 3,00    | 11,00   | 159,45  | 115,98  | 131,59  | 69,08   | 58,63   | 50,71   |
| 4,00    | 1,00    | 7,00    | 56,32   | 54,57   | 56,61   | 46,81   | 55,58   | 46,52   |
| 0,00    | 0,00    | 9999,00 | 26,59   | 20,80   | 9999,00 | 6,91    | 8,76    | 9999,00 |
| 3,00    | 1,00    | 7,00    | 68,43   | 73,17   | 86,22   | 58,58   | 67,42   | 68,03   |
| 9999,00 | 0,00    | 9999,00 | 9999,00 | 9999,00 | 9999,00 | 9999,00 | 9999,00 | 9999,00 |
| 2,00    | 0,00    | 4,00    | 48,53   | 58,60   | 9999,00 | 16,89   | 47,91   | 9999,00 |
| 4,00    | 0,00    | 5,00    | 69,92   | 38,85   | 48,53   | 13,07   | 12,22   | 16,89   |
| 0,00    | 0,00    | 1,00    | 48,69   | 63,95   | 63,61   | 39,68   | 30,23   | 9999,00 |
| 3,00    | 3,00    | 10,00   | 90,67   | 94,17   | 9999,00 | 41,88   | 38,23   | 9999,00 |
| 4,00    | 3,00    | 11,00   | 60,98   | 118,88  | 79,09   | 26,73   | 15,28   | 41,08   |
| 4,00    | 2,00    | 10,00   | 75,78   | 77,89   | 9999,00 | 32,34   | 37,98   | 9999,00 |
| 4,00    | 2,00    | 10,00   | 114,35  | 111,89  | 118,84  | 72,05   | 65,48   | 59,16   |
| 4,00    | 2,00    | 10,00   | 80,91   | 91,18   | 87,25   | 46,13   | 45,03   | 59,25   |
| 4,00    | 3,00    | 11,00   | 49,39   | 60,73   | 64,83   | 52,54   | 57,54   | 56,53   |
| 4,00    | 1,00    | 9,00    | 101,53  | 105,95  | 100,98  | 84,61   | 86,35   | 85,71   |
| 3,00    | 2,00    | 9,00    | 67,69   | 78,04   | 81,08   | 87,60   | 97,84   | 70,56   |
| 4,00    | 1,00    | 8,00    | 41,82   | 45,58   | 9999,00 | 18,10   | 23,70   | 9999,00 |
| 4,00    | 0,00    | 6,00    | 82,56   | 81,04   | 81,85   | 22,79   | 21,35   | 23,67   |
| 4,00    | 2,00    | 9,00    | 101,71  | 97,41   | 101,71  | 50,12   | 71,35   | 41,80   |
| 4,00    | 3,00    | 10,00   | 110,05  | 91,90   | 89,93   | 27,85   | 14,75   | 14,90   |
| 4,00    | 2,00    | 10,00   | 98,75   | 91,34   | 9999,00 | 48,86   | 55,42   | 9999,00 |
| 3,00    | 0,00    | 7,00    | 77,04   | 90,25   | 79,41   | 23,72   | 22,29   | 26,78   |
| 2,00    | 0,00    | 3,00    | 53,71   | 48,57   | 9999,00 | 31,74   | 16,06   | 9999,00 |
| 4,00    | 2,00    | 10,00   | 9999,00 | 9999,00 | 9999,00 | 9999,00 | 9999,00 | 9999,00 |
| 4,00    | 1,00    | 9,00    | 63,28   | 61,75   | 55,77   | 38,00   | 16,95   | 32,63   |
| 4,00    | 2,00    | 10,00   | 70,57   | 93,14   | 90,58   | 22,53   | 35,13   | 26,00   |
| 3,00    | 1,00    | 8,00    | 39,69   | 33,89   | 45,78   | 42,46   | 45,18   | 39,59   |
| 1,00    | 4,00    | 9,00    | 36,45   | 9999,00 | 9999,00 | 28,82   | 9999,00 | 9999,00 |
| 4,00    | 3,00    | 9999,00 | 90,64   | 97,41   | 94,24   | 61,62   | 65,70   | 59,45   |
| 4,00    | 4,00    | 11,00   | 44,22   | 75,17   | 85,27   | 45,03   | 70,59   | 81,10   |
| 4,00    | 1,00    | 6,00    | 20,04   | 27,51   | 26,18   | 14,84   | 13,64   | 12,76   |
| 3,00    | 1,00    | 8,00    | 61,55   | 59,89   | 64,79   | 42,58   | 48,88   | 53,28   |
| 3,00    | 3,00    | 8,00    | 48,00   | 54,56   | 18,96   | 32,66   | 23,77   | 7,78    |
| 1,00    | 0,00    | 2,00    | 3,72    | 12,03   | 10,98   | 14,19   | 9,32    | 13,27   |
| 2,00    | 9999,00 | 9999,00 | 18,96   | 9999,00 | 9999,00 | 7,78    | 9999,00 | 9999,00 |
| 2,00    | 1,00    | 4,00    | 33,31   | 25,70   | 25,73   | 5,81    | 23,06   | 6,78    |
| 4,00    | 1,00    | 7,00    | 46,17   | 48,82   | 40,30   | 5,83    | 9,07    | 13,04   |
| 3,00    | 1,00    | 5,00    | 48,72   | 46,33   | 32,30   | 26,66   | 27,60   | 46,42   |
| 2,00    | 1,00    | 4,00    | 9999,00 | 47,82   | 31,44   | 40,05   | 22,62   | 16,82   |
| 2,00    | 3,00    | 7,00    | 9999,00 | 9999,00 | 9999,00 | 9999,00 | 9999,00 | 9999,00 |
| 4,00    | 4,00    | 12,00   | 9,53    | 8,80    | 12,31   | 5,97    | 9,69    | 11,07   |
| 4,00    | 4,00    | 12,00   | 38,12   | 11,65   | 26,08   | 13,92   | 13,42   | 14,89   |
| 4,00    | 3,00    | 11,00   | 2,62    | 4,87    | 2,55    | 3,31    | 4,32    | 5,67    |
| 4,00    | 4,00    | 12,00   | 8,91    | 17,38   | 8,48    | 4,41    | 5,49    | 6,19    |
| 4,00    | 3,00    | 11,00   | 6,50    | 17,93   | 18,98   | 6,01    | 6,27    | 6,85    |

| piekflow1 | piekflow2 | piekflow3 | filter_§ |
|-----------|-----------|-----------|----------|
| 400,00    | 410,00    | 460,00    | 1        |
| 350,00    | 400,00    | 400,00    | 1        |
| 480,00    | 290,00    | 380,00    | 1        |
| 320,00    | 370,00    | 310,00    | 1        |
| 360,00    | 440,00    | 450,00    | 1        |
| 150,00    | 200,00    | 250,00    | 1        |
| 150,00    | 250,00    | 200,00    | 1        |
| 170,00    | 260,00    | 250,00    | 1        |
| 150,00    | 190,00    | 140,00    | 1        |
| 550,00    | 550,00    | 550,00    | 1        |
| 540,00    | 550,00    | 530,00    | 1        |
| 690,00    | 680,00    | 690,00    | 1        |
| 9999,00   | 9999,00   | 9999,00   | 1        |
| 490,00    | 490,00    | 490,00    | 1        |
| 380,00    | 410,00    | 390,00    | 1        |
| 630,00    | 590,00    | 610,00    | 1        |
| 720,00    | 720,00    | 720,00    | 1        |
| 650,00    | 600,00    | 600,00    | 1        |
| 430,00    | 500,00    | 470,00    | 1        |
| 520,00    | 500,00    | 480,00    | 1        |
| 660,00    | 660,00    | 650,00    | 1        |
| 670,00    | 660,00    | 660,00    | 1        |
| 510,00    | 490,00    | 500,00    | 1        |
| 550,00    | 540,00    | 550,00    | 1        |
| 390,00    | 390,00    | 370,00    | 1        |
| 380,00    | 430,00    | 430,00    | 1        |
| 350,00    | 380,00    | 240,00    | 1        |
| 530,00    | 540,00    | 600,00    | 1        |
| 300,00    | 320,00    | 350,00    | 1        |
| 480,00    | 470,00    | 450,00    | 1        |
| 490,00    | 480,00    | 500,00    | 1        |
| 450,00    | 400,00    | 370,00    | 1        |
| 460,00    | 480,00    | 480,00    | 1        |
| 330,00    | 340,00    | 330,00    | 1        |
| 320,00    | 270,00    | 410,00    | 1        |
| 9999,00   | 9999,00   | 9999,00   | 0        |
| 350,00    | 380,00    | 340,00    | 0        |
| 9999,00   | 9999,00   | 9999,00   | 0        |
| 160,00    | 300,00    | 320,00    | 0        |
| 150,00    | 150,00    | 120,00    | 0        |
| 200,00    | 200,00    | 150,00    | 0        |
| 480,00    | 370,00    | 350,00    | 0        |
| 350,00    | 370,00    | 370,00    | 0        |
| 400,00    | 270,00    | 300,00    | 0        |
| 80,00     | 100,00    | 100,00    | 0        |
| 240,00    | 200,00    | 230,00    | 0        |
| 250,00    | 270,00    | 260,00    | 0        |
| 350,00    | 250,00    | 230,00    | 0        |
| 320,00    | 200,00    | 250,00    | 0        |

|         |         |         |   |
|---------|---------|---------|---|
| 320,00  | 200,00  | 250,00  | 0 |
| 300,00  | 340,00  | 300,00  | 0 |
| 340,00  | 400,00  | 400,00  | 0 |
| 150,00  | 160,00  | 180,00  | 0 |
| 60,00   | 80,00   | 90,00   | 0 |
| 9999,00 | 9999,00 | 9999,00 | 0 |
| 9999,00 | 9999,00 | 9999,00 | 0 |
| 9999,00 | 9999,00 | 9999,00 | 0 |
| 170,00  | 170,00  | 150,00  | 0 |
| 200,00  | 185,00  | 200,00  | 0 |
| 210,00  | 220,00  | 230,00  | 0 |
| 80,00   | 100,00  | 100,00  | 0 |
| 120,00  | 200,00  | 210,00  | 0 |
| 200,00  | 250,00  | 280,00  | 0 |
| 200,00  | 210,00  | 220,00  | 0 |
| 100,00  | 140,00  | 200,00  | 0 |
| 250,00  | 280,00  | 270,00  | 0 |
| 400,00  | 490,00  | 410,00  | 0 |
| 360,00  | 270,00  | 300,00  | 0 |
| 130,00  | 120,00  | 80,00   | 0 |
| 120,00  | 60,00   | 70,00   | 0 |
| 100,00  | 120,00  | 170,00  | 0 |
| 100,00  | 150,00  | 160,00  | 0 |
| 170,00  | 190,00  | 200,00  | 0 |
| 120,00  | 220,00  | 170,00  | 0 |
| 60,00   | 200,00  | 160,00  | 0 |
| 150,00  | 100,00  | 180,00  | 0 |
| 70,00   | 60,00   | 60,00   | 0 |
| 140,00  | 260,00  | 290,00  | 0 |
| 40,00   | 70,00   | 80,00   | 0 |
| 150,00  | 250,00  | 220,00  | 0 |
| 200,00  | 230,00  | 350,00  | 0 |
| 120,00  | 160,00  | 120,00  | 0 |
| 150,00  | 100,00  | 130,00  | 0 |
| 460,00  | 460,00  | 470,00  | 0 |
| 90,00   | 80,00   | 70,00   | 0 |
| 220,00  | 270,00  | 300,00  | 0 |
| 250,00  | 270,00  | 260,00  | 0 |
| 360,00  | 390,00  | 410,00  | 0 |
| 110,00  | 200,00  | 300,00  | 0 |
| 9999,00 | 9999,00 | 9999,00 | 0 |
| 450,00  | 460,00  | 470,00  | 0 |
| 470,00  | 500,00  | 490,00  | 0 |
| 270,00  | 370,00  | 350,00  | 0 |
| 310,00  | 370,00  | 430,00  | 0 |
| 200,00  | 250,00  | 230,00  | 0 |
| 70,00   | 70,00   | 120,00  | 0 |
| 150,00  | 200,00  | 180,00  | 0 |
| 440,00  | 470,00  | 470,00  | 0 |
| 270,00  | 270,00  | 200,00  | 0 |

|         |         |         |   |
|---------|---------|---------|---|
| 440,00  | 400,00  | 440,00  | 0 |
| 470,00  | 500,00  | 470,00  | 0 |
| 150,00  | 130,00  | 250,00  | 0 |
| 9999,00 | 9999,00 | 9999,00 | 0 |
| 280,00  | 370,00  | 370,00  | 0 |
| 9999,00 | 9999,00 | 9999,00 | 0 |
| 350,00  | 600,00  | 350,00  | 0 |
| 300,00  | 250,00  | 250,00  | 0 |
| 100,00  | 130,00  | 130,00  | 0 |
| 230,00  | 160,00  | 230,00  | 0 |
| 400,00  | 400,00  | 400,00  | 0 |
| 350,00  | 360,00  | 360,00  | 0 |
| 580,00  | 570,00  | 510,00  | 0 |
| 200,00  | 270,00  | 270,00  | 0 |
| 290,00  | 330,00  | 300,00  | 0 |
| 410,00  | 450,00  | 450,00  | 0 |
| 520,00  | 540,00  | 550,00  | 0 |
| 160,00  | 160,00  | 230,00  | 0 |
| 220,00  | 250,00  | 350,00  | 0 |
| 450,00  | 470,00  | 490,00  | 0 |
| 330,00  | 350,00  | 380,00  | 0 |
| 370,00  | 390,00  | 370,00  | 0 |
| 350,00  | 420,00  | 390,00  | 0 |
| 250,00  | 350,00  | 320,00  | 0 |
| 320,00  | 320,00  | 300,00  | 0 |
| 260,00  | 300,00  | 360,00  | 0 |
| 550,00  | 540,00  | 560,00  | 0 |
| 160,00  | 210,00  | 330,00  | 0 |
| 210,00  | 240,00  | 280,00  | 0 |
| 450,00  | 450,00  | 460,00  | 0 |
| 380,00  | 385,00  | 490,00  | 0 |
| 380,00  | 380,00  | 240,00  | 0 |
| 180,00  | 250,00  | 250,00  | 0 |
| 140,00  | 180,00  | 180,00  | 0 |
| 90,00   | 100,00  | 110,00  | 0 |
| 150,00  | 100,00  | 100,00  | 0 |
| 130,00  | 160,00  | 130,00  | 0 |
| 320,00  | 310,00  | 310,00  | 0 |
| 224,00  | 200,00  | 210,00  | 0 |
| 9999,00 | 9999,00 | 9999,00 | 0 |
| 150,00  | 150,00  | 150,00  | 0 |
| 575,00  | 500,00  | 500,00  | 0 |
| 360,00  | 530,00  | 560,00  | 0 |
| 100,00  | 140,00  | 130,00  | 0 |
| 220,00  | 270,00  | 170,00  | 0 |
| 550,00  | 575,00  | 600,00  | 0 |
